# Supplementary material
Source: PubMed Central journal article supplement (PMC4122299)

## Supporting Information

### Development of PET Tracers for Noninvasive Imaging of the Reactive Oxygen Species, Superoxide, *in Vivo*

Wenhua Chu<sup>1</sup>, Andre Chepetan<sup>2</sup>, Dong Zhou<sup>1</sup>, Kooresh I. Shoghi<sup>1</sup>, Jinbin Xu<sup>1</sup>, Laura L. Dugan<sup>2</sup>, Robert J. Gropler<sup>1</sup>, Mark A. Mintun<sup>1</sup>, and Robert H. Mach<sup>1\*</sup>

<sup>1</sup>Department of Radiology, Washington University School of Medicine, St. Louis, MO 63110, USA. <sup>2</sup>Division of Geriatric Medicine, Departments of Medicine and Neuroscience, University of California-San Diego, La Jolla, CA 92093

Experimental procedures, NMR spectra, elemental analysis data.

Total pages: 38

#### Figures: S1.

**Figure S2.** Kinetic plot of DHE oxidation (left) and 12 oxidation (right). Superoxide sources include catalysis of hypoxanthine by xanthine oxidase (HX/OX) and decomposition of SIN-1 chloride.

**Figure S3.** Semi-preparative HPLC purification of [<sup>18</sup>F]12

**Figure S4.** Analytical HPLC of DHE analogue 12

**Figure S5.** Biodistribution of [<sup>18</sup>F]12 in DOX-treated and untreated mice.

**Figure S6.** Stability of [<sup>18</sup>F]12 in DOX-treated and untreated mice *in vitro* and *in vivo*

**Table S1.** Reagent Concentrations

Compounds: 2, 3, 4, 5, 6, 7, 8, 9, 10, 11, 12, 13, and 14 <sup>1</sup>H, <sup>13</sup>C NMR spectra.

Figure. S1

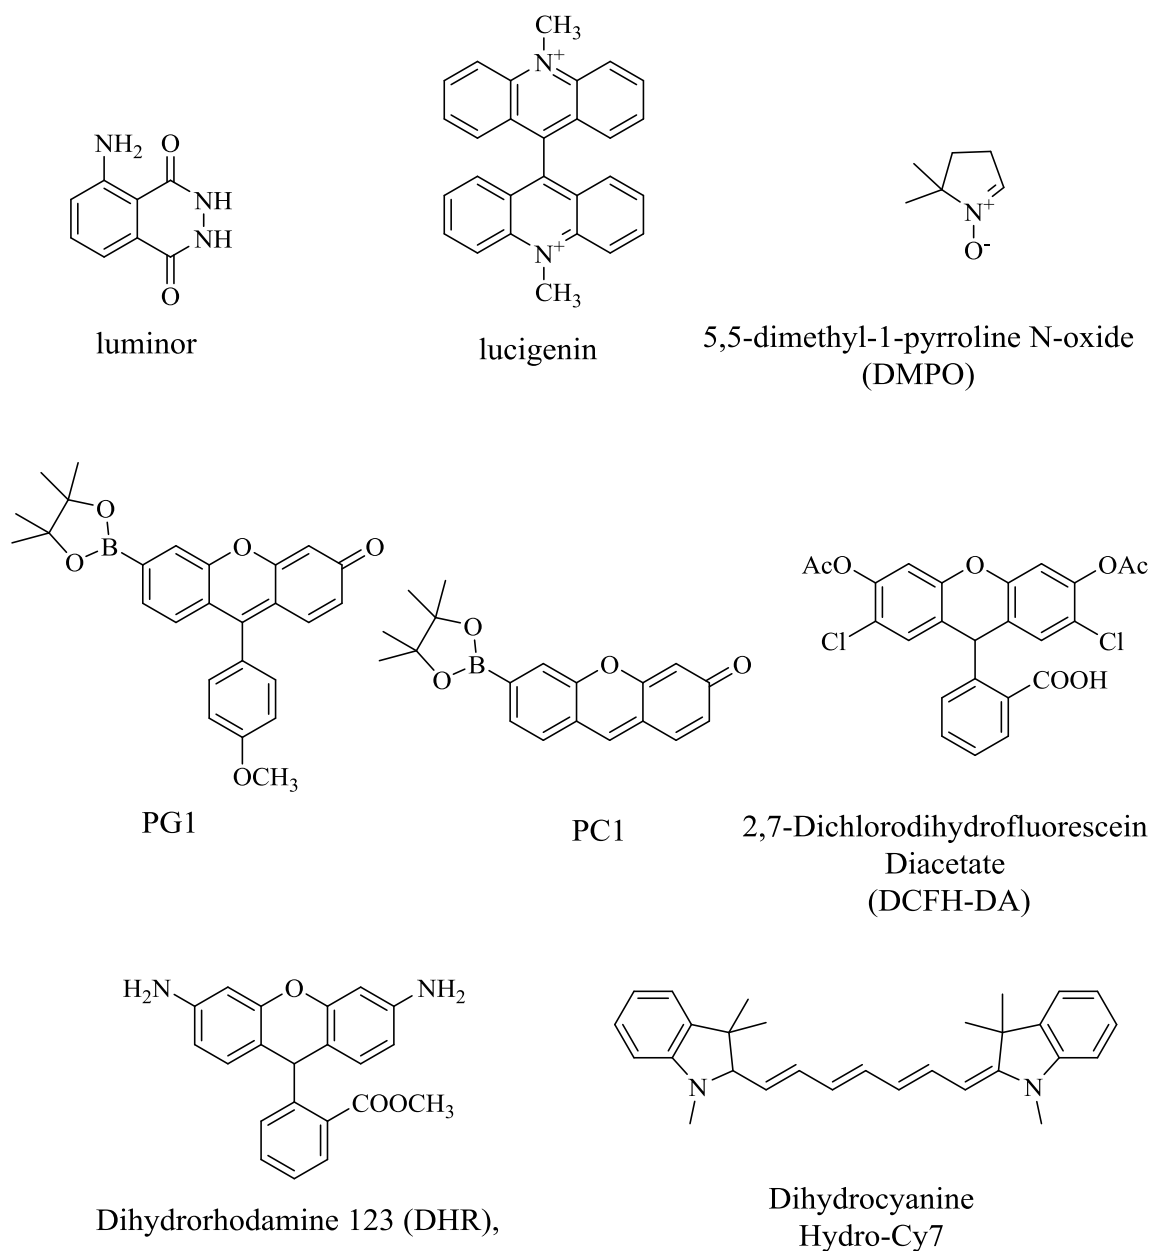

## Experimental

### Preparation of stock solutions

Reagent sources and final well concentrations are summarized in Table S1. Phosphate buffer saline

(PBS, pH 7.4) was prepared using Milli-Q plus system (Millicore Corp.). The following stock solutions were prepared in PBS: 0.1 mM. All solutions were prepared monthly and stored at 4 °C except for xanthine oxidase, which was diluted from commercial stock just prior to use. Hypoxanthine was prepared fresh on the day of experiment using slightly alkaline PBS to dissolve the powder. The cold (non-radiolabeled) compounds were synthesized and stored under anaerobic conditions in the dark until they were ready for use. All reagents were warmed to room temperature just prior to use. Two reaction solutions were prepared prior to each experiment, using the above stock solutions. The solutions were made to match the final well concentration summarized in Table S1. Both solutions contained PBS buffer and salmon sperm DNA (fluorescence enhancer, 250 µg/ml final concentration): solution A consisted of hypoxanthine and xanthine oxidase, solution B was made up of SIN-1 chloride and CPTIO.

Table S1. Reagent Concentrations

| Reagent                                                               | Plate reader assay concentration <sup>a</sup> |      | Source            |
|-----------------------------------------------------------------------|-----------------------------------------------|------|-------------------|
|                                                                       | µM                                            | U/ml |                   |
| horseradish peroxidase (HRP)                                          |                                               | 0.2  | Sigma-Aldrich     |
| hypoxanthine (HX)                                                     | 1×10 <sup>3</sup>                             |      | Sigma-Aldrich     |
| xanthine oxidase (XO)                                                 |                                               | 0.05 | Sigma-Aldrich     |
|                                                                       |                                               | 2    |                   |
| hydrogen peroxide                                                     | 1×10 <sup>3</sup>                             |      | Fisher-Scientific |
| <b>12</b>                                                             | 158                                           |      |                   |
| dihydroethidium (DHE)                                                 | 158                                           |      | Invitrogen        |
| Linsidomine (SIN-1 chloride)                                          | 15.8                                          |      | Invitrogen        |
| superoxide dismutase (SOD)                                            |                                               | 575  | Calbiochem        |
| catalase                                                              |                                               | 60   | Calbiochem        |
| 2-4-carboxyphenyl-4,4,5,5-tetramethylimidazole-1-oxyl-3-oxide (CPTIO) | 262                                           |      | Calbiochem        |

<sup>a</sup> These amounts reflect the final concentration inside each well after 12 or DHE compound was added.

## **In Vitro Fluorescence of 12**

Preliminary evaluation of the **12** was performed by fluorescence plate reader assay to compare specificity and kinetics of **12** and DHE oxidation by superoxide. The assay is performed in duplicates, using a Corning 96-well (12 columns × 8 rows) plate with a final reaction volume of 275 µl per well. All wells except for blank contained PBS-DNA buffer as described above. The final concentrations of all reagents are listed in Table S1. Well 2 contained only hypoxanthine and buffer, and served as the marker for autofluorescence. Wells 3-5 contained solution A, by itself (3), with addition of catalase (4), and with SOD (5). Hydrogen peroxide was added to wells 5 and 6, with and without horseradish peroxidase respectively. The last 2 wells in the row contained solution B only, (8) and with SOD (9). After adding the reagents, the **12** was added using a multichannel pipette.

The plate was inserted into the plate reader (Biotek Instruments Inc. FL400 Fluorescence Plate reader, supported by Biotek-KC4 Kineticalc Software). The automix function was activated for 2 seconds prior to each 30 second reading, and the plate was read at 590 nm and excited at 485 nm. The temperature was held constant at 37 °C for the entire 60 min assay. Data points were collected then analyzed in Matlab software. Each plate was dedicated to one fluorescent compound to avoid accidental mixing. Dihydroethidium and compound **12** were read in duplicates. Sampling of kinetic points from 5-14 min was used to compare reactivity of compound **12** with the oxidative radical and contrast it with the kinetics of DHE.

## **Platereader Kinetics Assay Results**

After testing various concentrations of reagents, we found those listed in Table S1 showed

consistent linear kinetics within the 5-15 minute range. One method of testing specificity of **12** towards ROS is using fluorescence kinetic plate reader assays. Using fluorescence as an indicator of the oxidation of **12**, we contrasted the kinetics of oxidation using various biological oxidative species including superoxide, hydrogen peroxide, peroxyxynitrite and hydroxyl radical. Typical kinetic assay results are shown in Figure S2, which contrast the kinetics DHE and **12**.

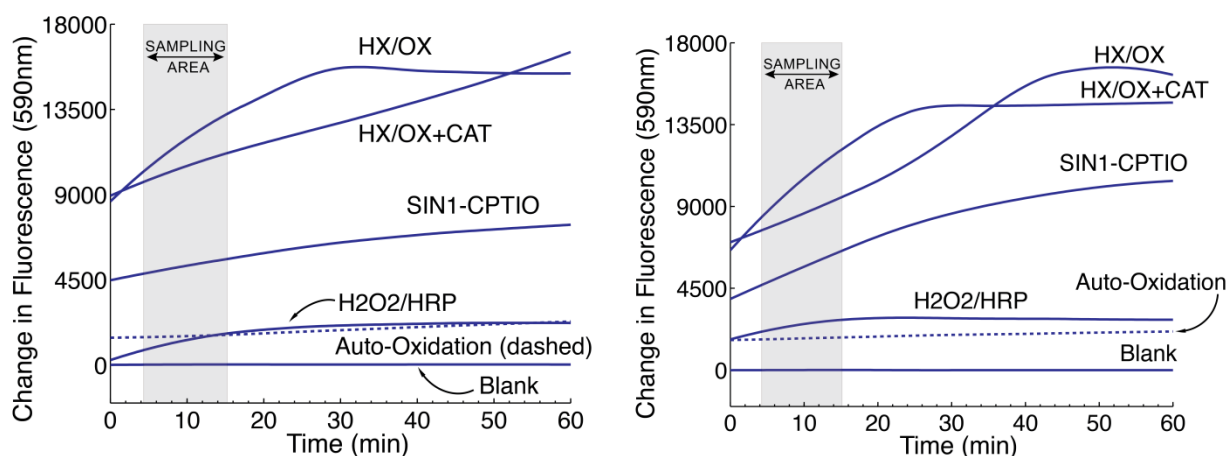

**Figure S2.** Kinetic plot of DHE oxidation (left) and **12** oxidation (right). Superoxide sources include catalysis of hypoxanthine by xanthine oxidase (HX/OX) and decomposition of SIN-1 chloride.

Superoxide was generated via catalysis of hypoxanthine by bovine-derived xanthine oxidase (HX/OX), which produces superoxide as well as hydrogen peroxide. The reagent concentrations were chosen for the reaction to shift to one-electron transfers, favoring  $O_2^-$  production. We also added catalase (CAT) to remove any hydrogen peroxide that might be generated, converting it to water and oxygen. However when hydrogen peroxide was added by itself, it acted like a mild reducing agent towards the compound **12** as well as DHE (data not shown). Superoxide dismutase (SOD) capture of superoxide was found to be an effective negative control; in its presence, auto-fluorescence kinetics was observed (data not shown). We implemented a secondary superoxide source that made use of the spontaneous decomposition of SIN-1 chloride in aqueous solutions to

produce superoxide and nitric oxide, which together form peroxynitrite. Under these conditions, no fluorescence was observed (data not shown), but with addition of 2-(4-carboxyphenyl)-4,4,5,5-tetramethylimidazole-1-oxyl-3-oxide (CPTIO), an effective NO scavenger, superoxide radical remained in solution and was able oxidize its substrate. Hydroxyl radical, which is often closely linked to superoxide generating systems, was generated using hydrogen peroxide and horseradish peroxidase, but it did not appear to any effects on the redox of **12** or DHE.

### **Microscopic fluorescence imaging of ROS.**

EMT6 mouse breast cancer cells were grown in DMEM containing 10% fetal bovine serum, 100 U/ml penicillin and 100 µg/ml streptomycin. The cell lines were maintained at 37 °C in a humidified 5% CO<sub>2</sub>/ 95% air atmosphere. Aliquots of ~2,000 EMT6 cells were plated in chamber slides and cultured for 48 h; 400 nM doxorubicin was then added for the treatment group; after 1 h incubation, cells were replenished with fresh cell culture medium containing 2 µM DHE or **12** for another period of incubation of 30 min. The cell culture medium was then removed and the chamber slides were coverslipped and imaged with a Nikon E600 upright fluorescence microscope.

### **EMT-6 Cell uptake assays.**

EMT-6 murine breast cancer cells were used as a model system to determine the uptake and retention of [<sup>18</sup>F]**12** and [<sup>18</sup>F]**14** by fluorescence microscopy. The EMT6 parental cell line used for experiments in Figure 3 was specifically selected because it has minimal expression of the p-glycoprotein transporter, and has been used as a “low MDR” control by many groups (1-3). Although DOX may induce MDR under some experimental conditions, the original paper by Twentyman et al. (4), describes escalating exposure to DOX over several weeks, and selection of

MDR clones, to produce the EMT6/AR1 drug-resistant cell line. That subline was not used in the current experiments. The 5 hour exposure to DOX used for **Figure 3** has not been shown to induce MDR. In **Figure 4**, DOX was not present and thus the issue of DOX-mediated inhibition of the MDR is not relevant. Our results showing increased uptake of the DHE analogue [<sup>18</sup>F]**12** in response to DOX-induced ROS both in cell culture (EMT-6 cells) and in vivo (DOX-induced cardiotoxicity) is in agreement with previously published reports using the parent compound, DHE. (5, 6)

**Method.** Aliquots of 4,000 EMT6 cells suspended in culture medium were added to each well of Costar 24-well cell culture plates 48 h before the uptake assays to achieve log growth phase with approximately 70% confluence at the time of the uptake assay (approximately 15,000 cells per well). Cell culture medium was removed and freshly prepared cell culture medium containing  $\sim 5.6 \times 10^6$  Bq/ml [<sup>18</sup>F]**12** or the oxidized compound [<sup>18</sup>F]**14** was added to each well; after 30 min incubation at 37°C, cells were rinsed twice with 1 ml ice cold 1 × PBS and then the cells were detached and harvested using 500 µl 0.05% EDTA/trypsin (Invitrogen, Grand Island, NY) treatment for ~2 min; protein concentration of the cell suspension was used to determine with a DC protein assay (Bio-Rad, Hercules, CA). A Wizard 1480 gamma counter (Perkin Elmer, Boston, MA) was used to count the radioactivity in each sample; uptake was expressed as ID%/mg protein.

#### **References for Doxorubicin in EMT6 cells:**

- 1 Mairinger S, Wanek T, Kuntner C, Doenmez Y, Strommer S, Stanek J, Capparelli E, Chiba P, Muller M, Colabufo NA, Langer O (2012) Synthesis and preclinical evaluation of the radiolabeled P-glycoprotein inhibitor [<sup>11</sup>C]MC113. Nucl Med Biol 39:1219-1225.

- 2 Roy A, Murakami M, Ernsting MJ, Hoang B, Undzys E, Li SD (2014) Carboxymethylcellulose-based and docetaxel-loaded nanoparticles circumvent P-glycoprotein mediated multidrug resistance. *Molecular Pharmaceutics*.
- 3 Twentyman PR, Reeve JG, Koch G, Wright KA (1990) Chemosensitisation by verapamil and cyclosporin A in mouse tumour cells expressing different levels of P-glycoprotein and CP22 (sorcini). *Br J Cancer* 62:89-95.
- 4 Wanek T, Kuntner C, Bankstahl JP, Bankstahl M, Stanek J, Sauberer M, Mairinger S, Strommer S, Wacheck V, Loscher W, Erker T, Muller M, Langer O (2012) A comparative small-animal PET evaluation of [<sup>11</sup>C]tariquidar, [<sup>11</sup>C]elacridar and (R)-[<sup>11</sup>C]verapamil for detection of P-glycoprotein-expressing murine breast cancer. *Eur J Nucl Med Mol Imaging*. 39:149-159.
5. Yoshida M, Shiojima I, Ikeda H, Komuro I. Chronic doxorubicin cardiotoxicity is mediated by oxidative DNA damage-ATM-p53-apoptosis pathway and attenuated by pitavastatin through the inhibition of Rac1 activity. *J Mol Cell Cardiol*. 2009;47(5):698-705.
- 6 Luanpitpong S, Chanvorachote P, Nimmannit U, Leonard SS, Stehlik C, Wang L, Rojanasakul Y. Mitochondrial superoxide mediates doxorubicin-induced keratinocyte apoptosis through oxidative modification of ERK and Bcl-2 ubiquitination. **Biochem Pharmacol**. 2012;83(12):1643-54; PubMed Central PMCID: PMC3337700.

**Image Analysis.** Standardized uptake values (SUV) were determined in anterolateral region of the myocardium to assess [<sup>18</sup>F]**12** uptake. A student's t-test was used to assess differences in uptake between groups.



***In vitro* blood stability studies:** An aliquot of [<sup>18</sup>F]**12** in ethanol (20 μL) was added to 1 mL of heparinized whole rat blood (Sprague-Dawley rat, mature) and incubated at room temperature. At 5 min and 60 min, an aliquot (400 μL) was removed and ascorbic acid (1 mg in 50 μL water) was added; and the red blood cells and plasma separated by centrifugation. The plasma was deproteinated with ACN (1 mL), and centrifuged to separate protein pellet and supernatant. The supernatant was diluted with 0.1% TFA in water (4 mL), and analyzed by reversed phase HPLC (Agilent SB-C18 250 × 9.4 mm 5 μ; Gradient mobile phase A: 25% ACN/ 75% water/0.1% TFA, B: 30% ACN/ 70% water/0.1% TFA, from A to B over 15 min; 4 mL/min). The eluent was collected in 0.5 min/tube, and the fractions counted in a well counter. The counts were decay-corrected and plotted.

***In vitro* heart stability studies:** The snap-frozen heart tissue was thawed in saline (1 mL) and homogenized; this homogenate was incubated with an aliquot of [<sup>18</sup>F]**12** in ethanol (20 μL) at room temperature. At 5 min and 60 min, an aliquot (400 μL) was mixed with ascorbic acid (2 mg in 100 μL water) and was centrifuged to pellet the cell debris. The aqueous extract was deproteinated with ACN (1 mL), and centrifuged to separate protein pellet and supernatant. The supernatant was analyzed by reversed phase HPLC as described above.

**The *in vivo* stability** of [<sup>18</sup>F]**12** was evaluated in DOX-treated mice. Mice were euthanized 60 min post-injection, and whole blood (200 μL) and heart were collected and immediately snap-frozen in liquid nitrogen. Blood and tissue were later thawed in ACN (1 mL) with ascorbic acid (1 mg) and homogenized. Supernatant and pellet were separated by centrifugation and held on ice to prevent sample degradation. The supernatant was analyzed by reversed phase HPLC as described above.

**Figure S3.** Semi-preparative HPLC purification of [ $^{18}\text{F}$ ]12

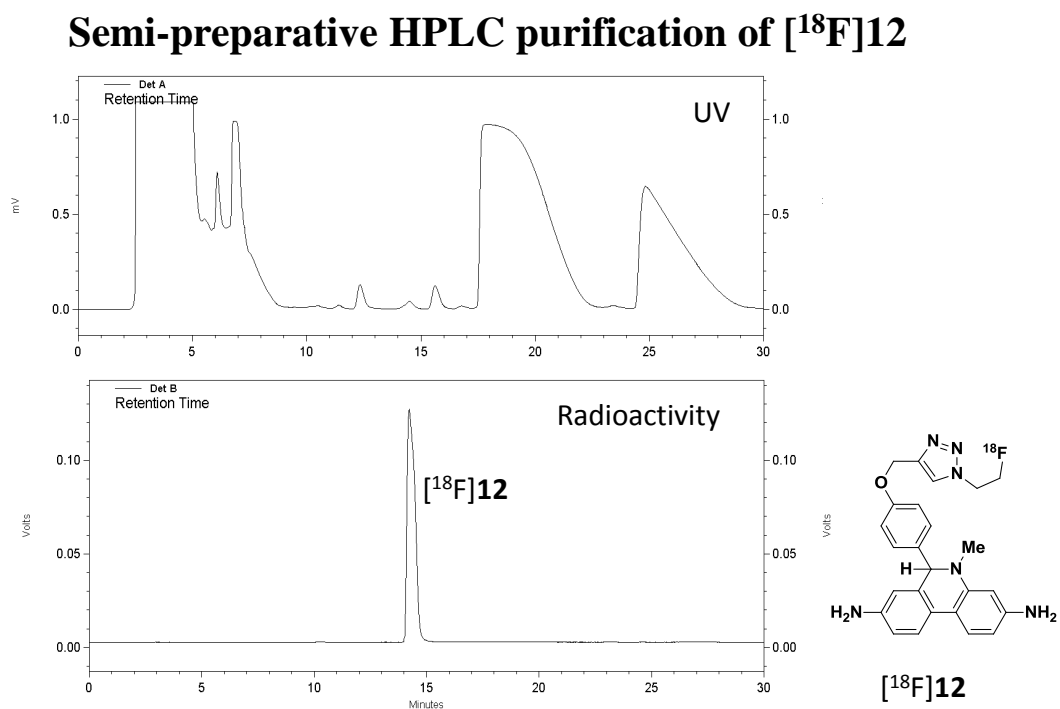

**Column:** Agilent SB-C18 250 9.4 mm 5 $\mu$   
**Mobile phase:** 18% ACN, 82% water, 0.1% TFA  
**Flow rate:** 3 mL/min; **UV:** 254 nm

## Analytical HPLC of DHE analogue [<sup>18</sup>F]12

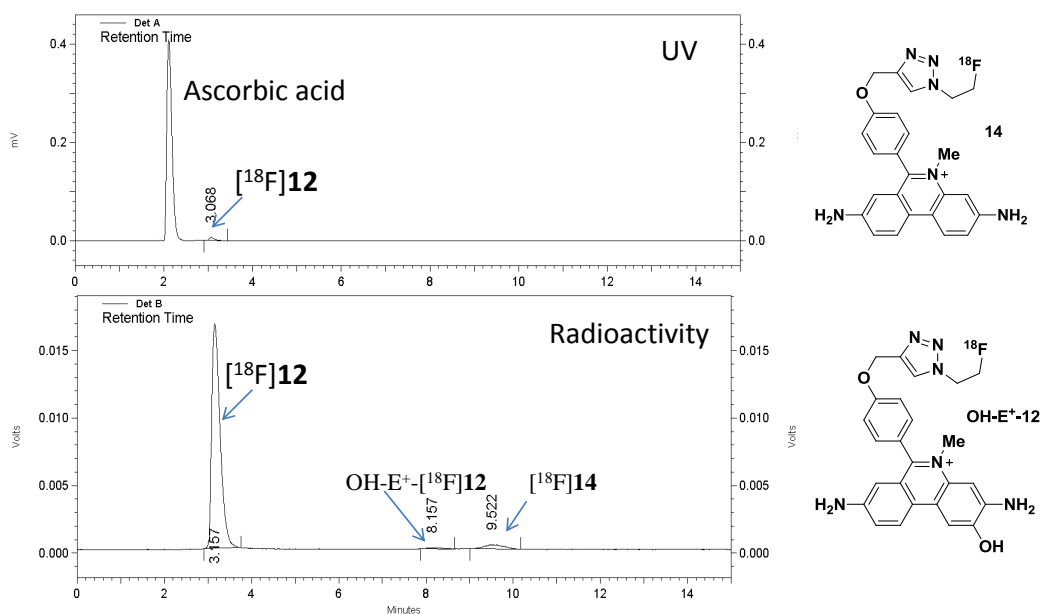

**Column:** Agilent SB-C18 250X4.6 mm 5 $\mu$   
**Mobile phase:** 30% ACN, 70% water, 0.1% TFA  
**Flow rate:** 1 mL/min.; **UV:** 254 nm

**Figure S4.** Analytical HPLC of DHE analogue **12**

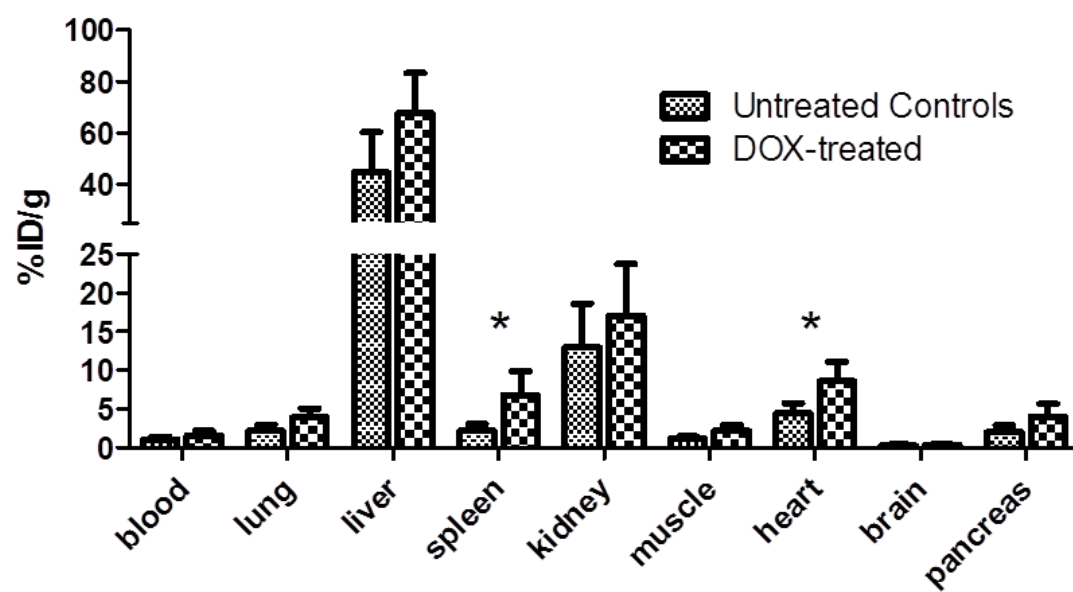

**Figure S5.** Biodistribution of [<sup>18</sup>F]12 in DOX-treated and untreated mice.

STANDARD 1H OBSERVE

```

expl stdlh
SAMPLE
date Jul 2 2009 DEC. & VT
solvent DMSO dfrq 300.050
file exp dn 300.050 H1
ACQUISITION exp dpwr 30
sfreq 300.050 dof 0
at 1.998 dm nnn C
np 17984 dnr 200
sw 4500.5 wtfile
fb 2600 proc
bs 16 fn ft
dpr 7.49 wexp
d1 1.000 wexp
tof 0 wnt
nt 16 wnt
ct 16
alock n
gain not used
FLACS
f1 n
in n
dp n
DISPLAY
sp -50.4
vp 3190.1
vc 200
sc 0
wc 250
hzmm 12.76
ls 6562.15
rfi 1495.5
th 750.2
ins 100.000
nm cdc ph
  
```

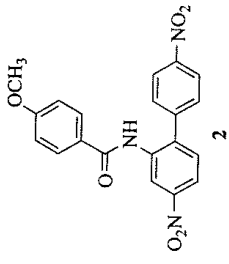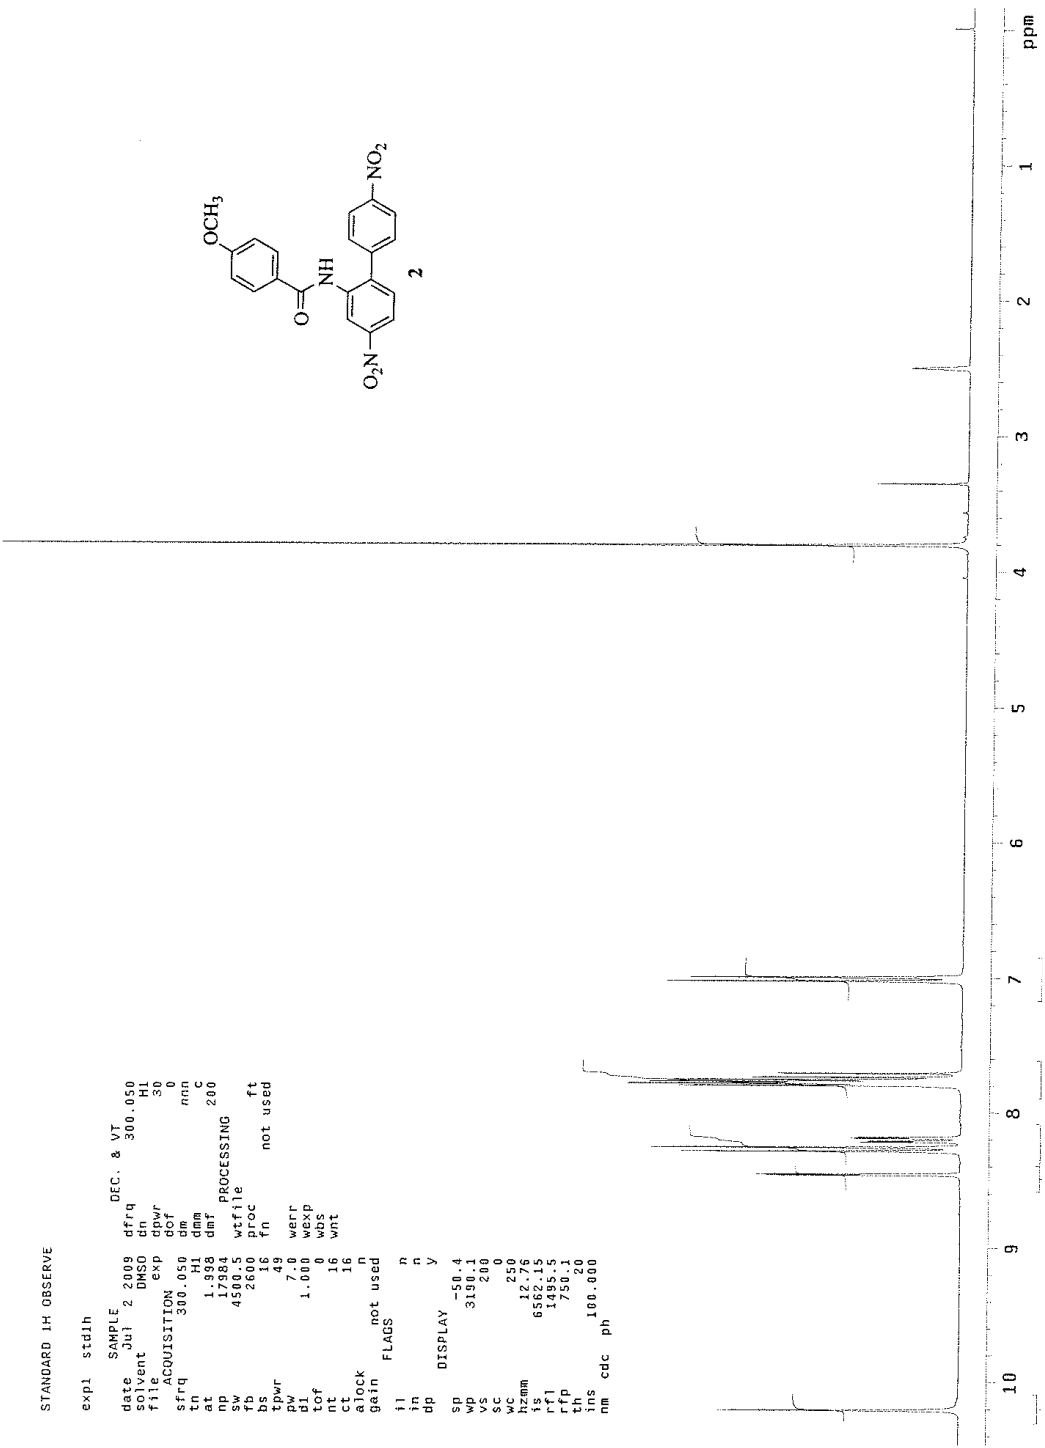

13C OBSERVE

```
expl std13c
SAMPLE
date Jul 2 2009 DEC. & VT
solvent DMSO dn 300.050
file exp dpwr 39
ACQUISITION exp dof 0
sfrq 75.455 dm yyy
n 0 C13 dmm
sw 32758 dmf 10316
fb 18761.7 lb PROCESSING 1.15
bs 10400 wtfile
tpwr 16 proc ft
dl 53 fn not used
dl 45 werr
nt 1.320 wexp
nt 1024 wpsp
ct 240 wnt
alock n
gain not used
fl n
in n
dp n
DISPLAY
sp -185.1
wp 15389.1
vc 50
wc 250
hzmm 61.56
fs 500.00
rfi 4851.0
rfp 2980.2
lps 5
nm no ph 100.000
```

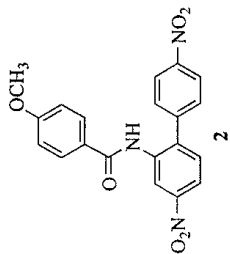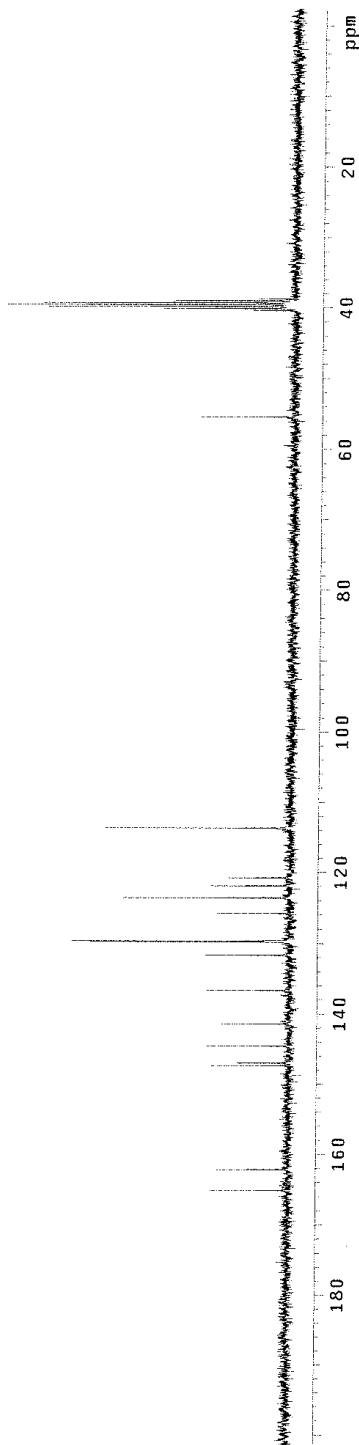

STANDARD 1H OBSERVE

```

expl  stdh
SAMPLE
date    Jul 7 2009      DEC. & VT
solvent  Jul CDC13      dn    300.049
file     exp          dpwr   30
$frq    300.049      dm     0
at      1.991        dmh    200
np      1.7894       dmr    PROCESSING
sw      4500.5       wf file
fb      2600         proc
bs      16           fn
tpwr    49          werr   not used
pv      7.0         wssp
tdf     1.000       wnt
nt      18
ct      16
alock   n
gain    not used
il      n
in      n
dp      v
DISPLAY
sp      -50.9
wp      2580.6
rs      200
sc      200
wc      250
hzmm    10.32
is      4178.31
rfi     751.3
tff     0
tffp    20
ins     100.000
nm cdc  ph
  
```

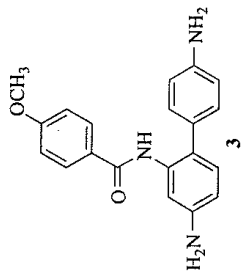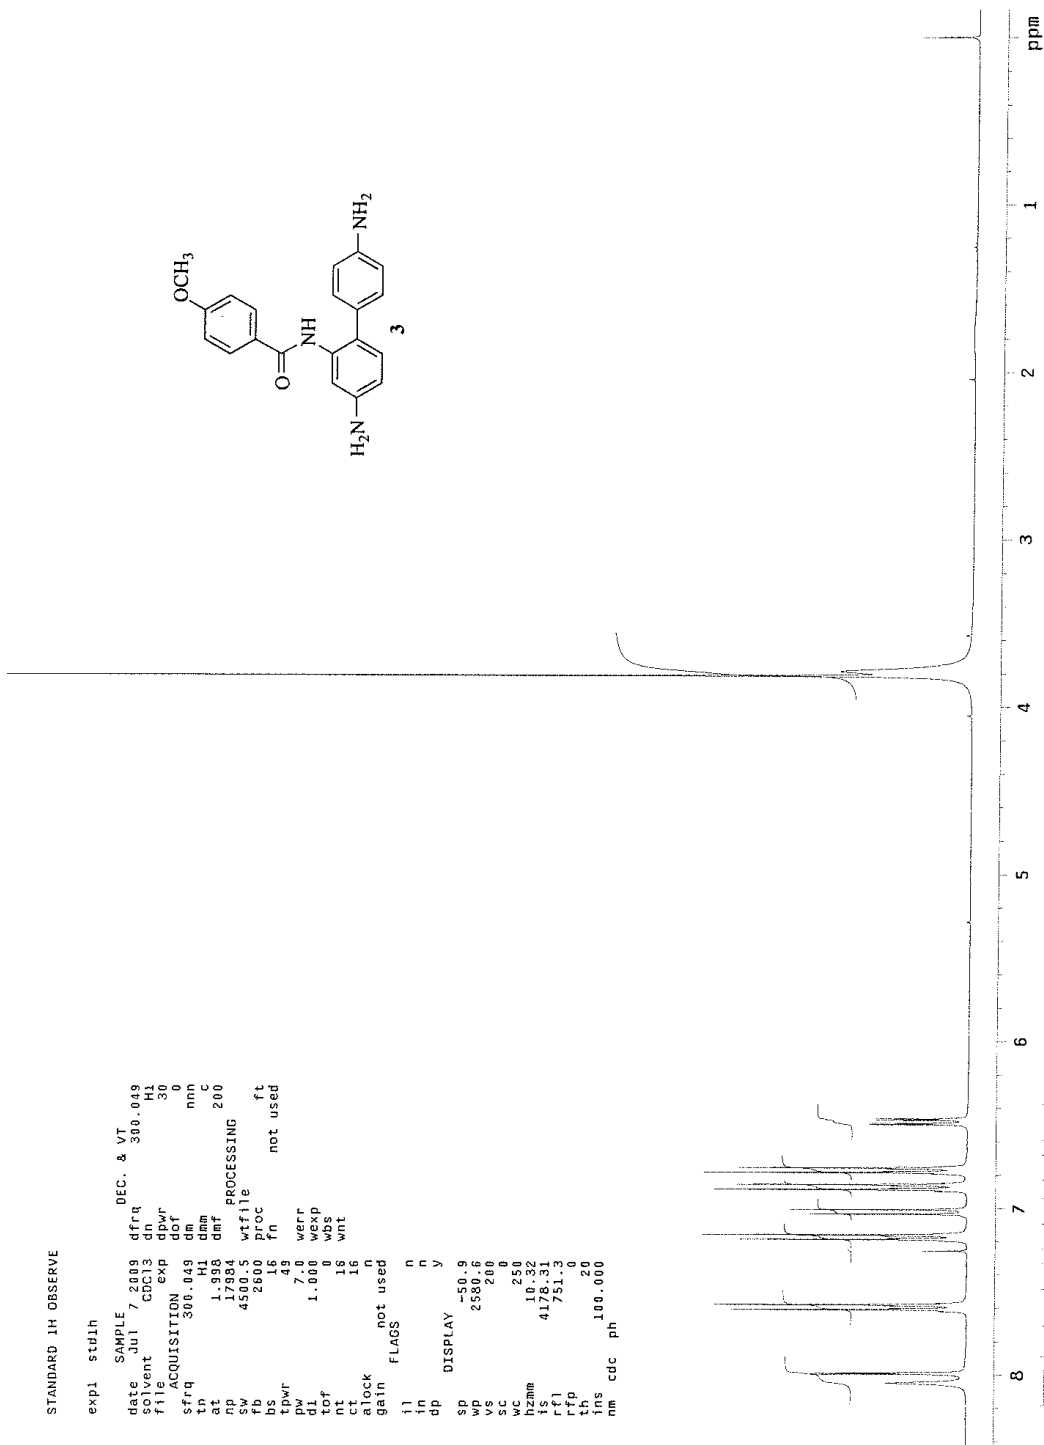

13C OBSERVE

exp1 std13c

```

SAMPLE      DEC. & VT
date       Jul 7 2009      dfrq
solvent    CDC13           dn      300.049
file       exp             dpr    39
ACQUISITION exp          dpr    0
sfrq      75.415         dm
at        0.873          dmf
np        32758          dmf    10316
sw        18761.7        lb      PROCESSING 1.15
fb        10400          wtfile
bs        16             proc   ft
dpr       4.53           fn      not used
dl        1.327         werr
tof       1024           wexp
ct        320           wnt
alock    not used
gain     not used
flags
il       n
in       n
dp       y
DISPLAY
sp       -84.9
vp       15589.1
vc       0
sc       0
wc       250
hzmm    61.56
ls       500.00
rfi     7651.0
thp     5893.6
ins     100.000
nm no ph

```

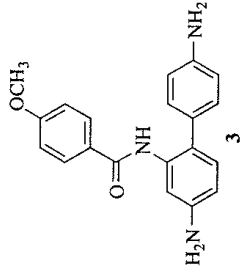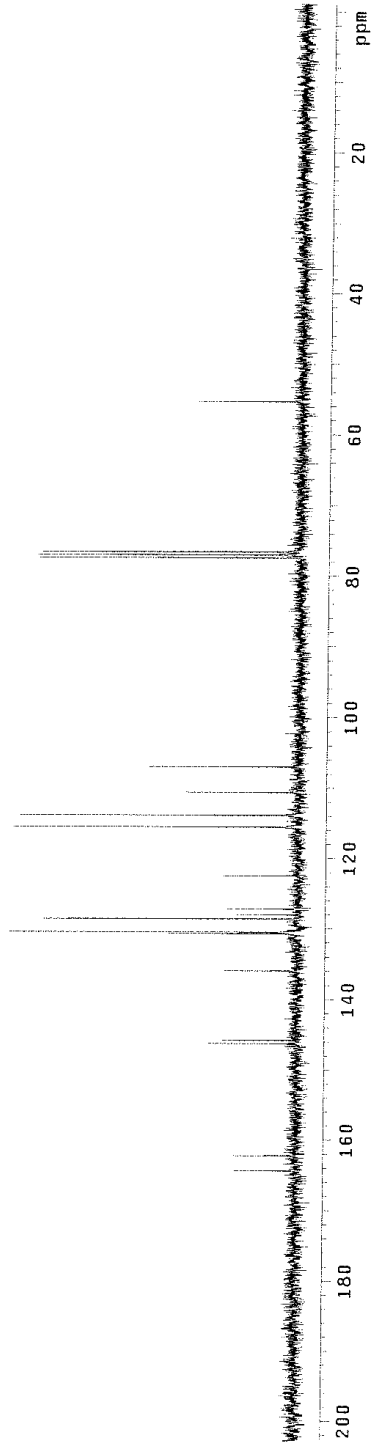



STANDARD 1H OBSERVE

```

exp1 std1h
SAMPLE
date Jul 8 2009 DEC. & VT
solvent DMSO dfrq 300.050
file H1 dn 30
ACQUISITION exp dpwr 30
sfrq 300.050 dm dof 0
at 1.898 dnm nnn
np 17984 dnr 200
sw 4500.5 wtfile
fb 2600 proc
bs 16 fn
dpwr 49 wprf
d1 1.000 wbsp
tof 0 wnt
nt 16
ct 16
atlock n
gain not used
fl n
in n
dp y
SP DISPLAY
VE -96.2
VC 3127.5
SC 200
WC 250
hzmm 12.51
IS 4959.38
rfi 1495.7
th 730.1
ins 100.000
nm cdc ph
  
```

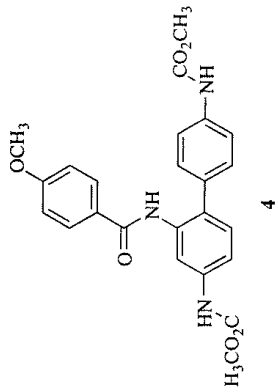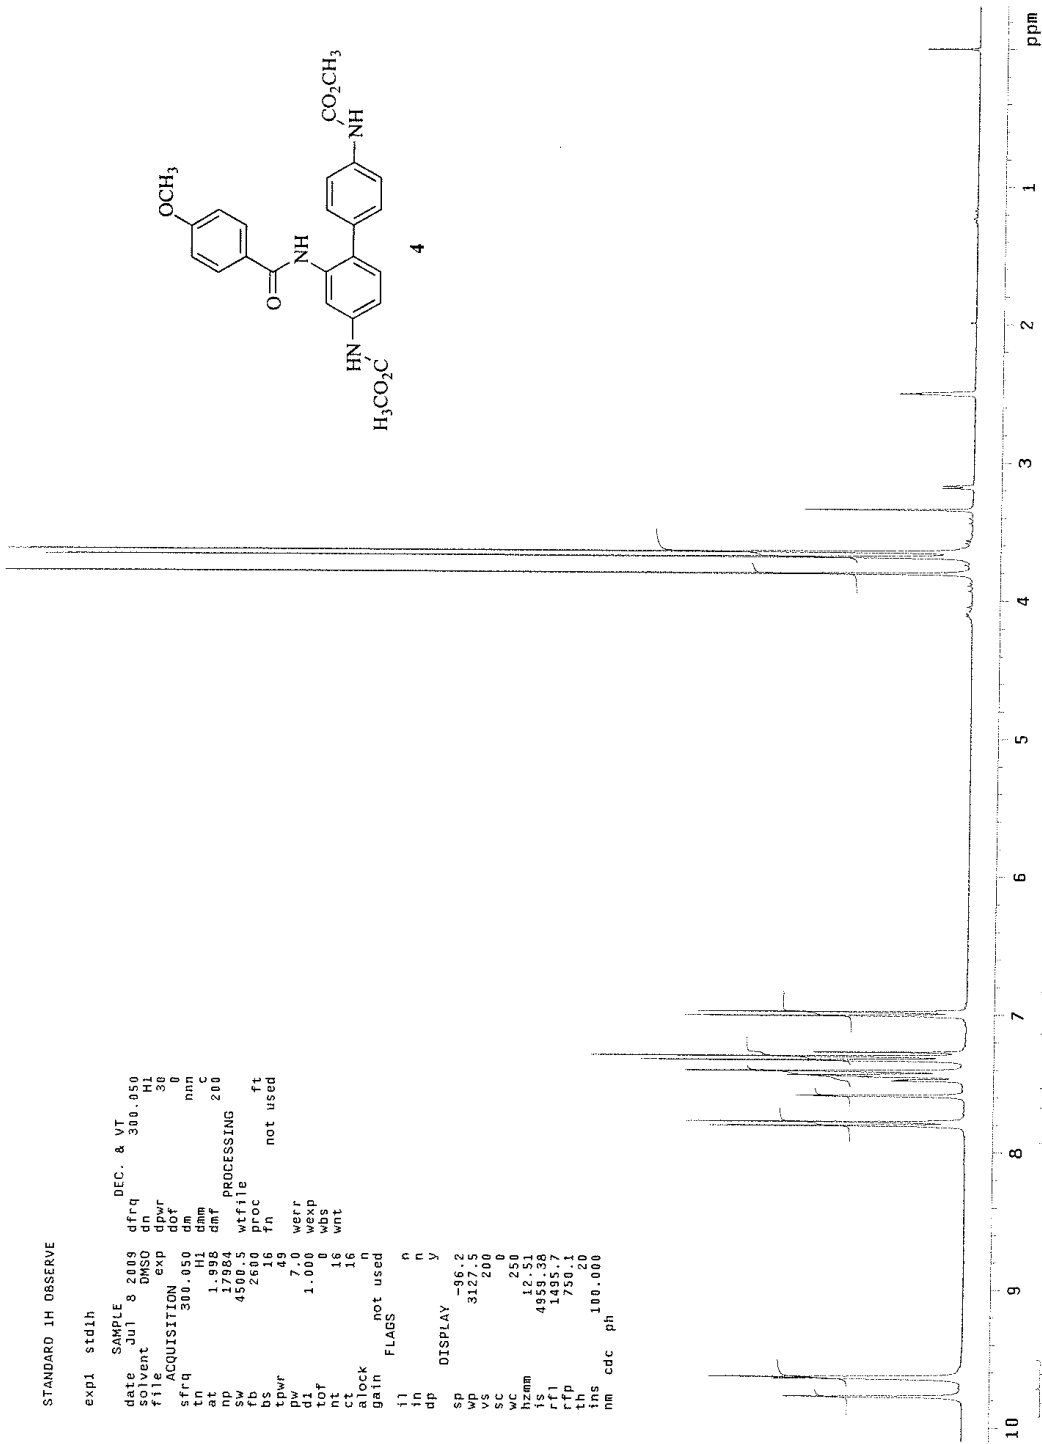

13C OBSERVE

expl std13c

SAMPLE DEC. & VT  
date Jul 8 2009 dfrq 300.058  
solvent Jul DMSO dn 39  
file exp dpr H1  
ACQUISITION exp dpr 39  
sfrq 75.455 dot 0  
tn 75.413 dam yyv w  
at 0.873 dmf 10316  
np 32758 lb PROCESSING 1.15  
sp 18761.7 lb  
td 10400 wtf file  
pw 4.5 in proc  
d1 1.327 werr ft  
nt 1024 wbs not used  
ct 480 wnt  
gain n  
FLAGS not used  
il n  
in n  
dp y  
DISPLAY -232.2  
WD 15432.6  
V5 150  
SC 0  
WC 250  
hzmm 61.65  
rg 500.00  
rf 2366.2  
rfd 2366.2  
th  
ins  
nm no ph 100.000

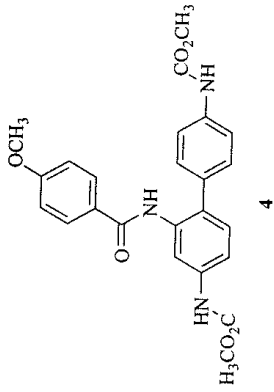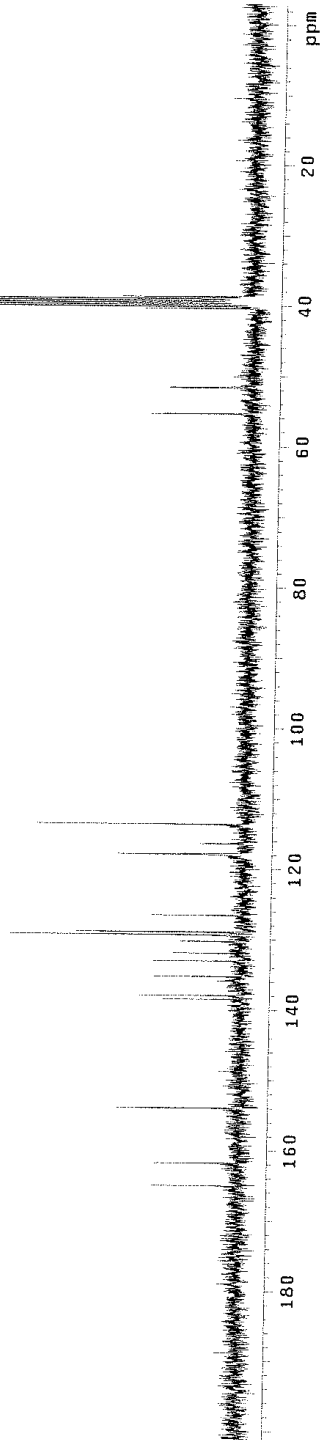

STANDARD 1H OBSERVE

```

exp1 stdih
SAMPLE
date Apr 11 2011 DEC. & VT
solvent dmsd 300.050
file exp dpwr 30
sfrq 300.050 dm nmr
ac 1.984 dm c
nt 1788 dmr PROCESSING 200
sw 4500.5 wifile
bs 2600 proc ft
tpwr 749 not used
pw 7.0 werr
pr 1.000 wexp
nt 64 wnt
ct 32
alock not used
gain n
il n
in n
dp DISPLAY
sp 285.4
wp 2819.8
sc 100
wc 250
hzmm 11.28
rs 5224.84
rf1 771.3
rfp 0
tfs 0
tms 100.000
nm cdc ph
  
```

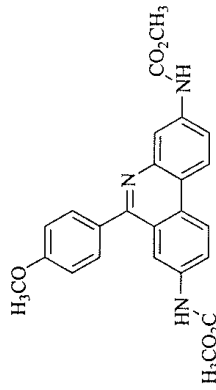

5

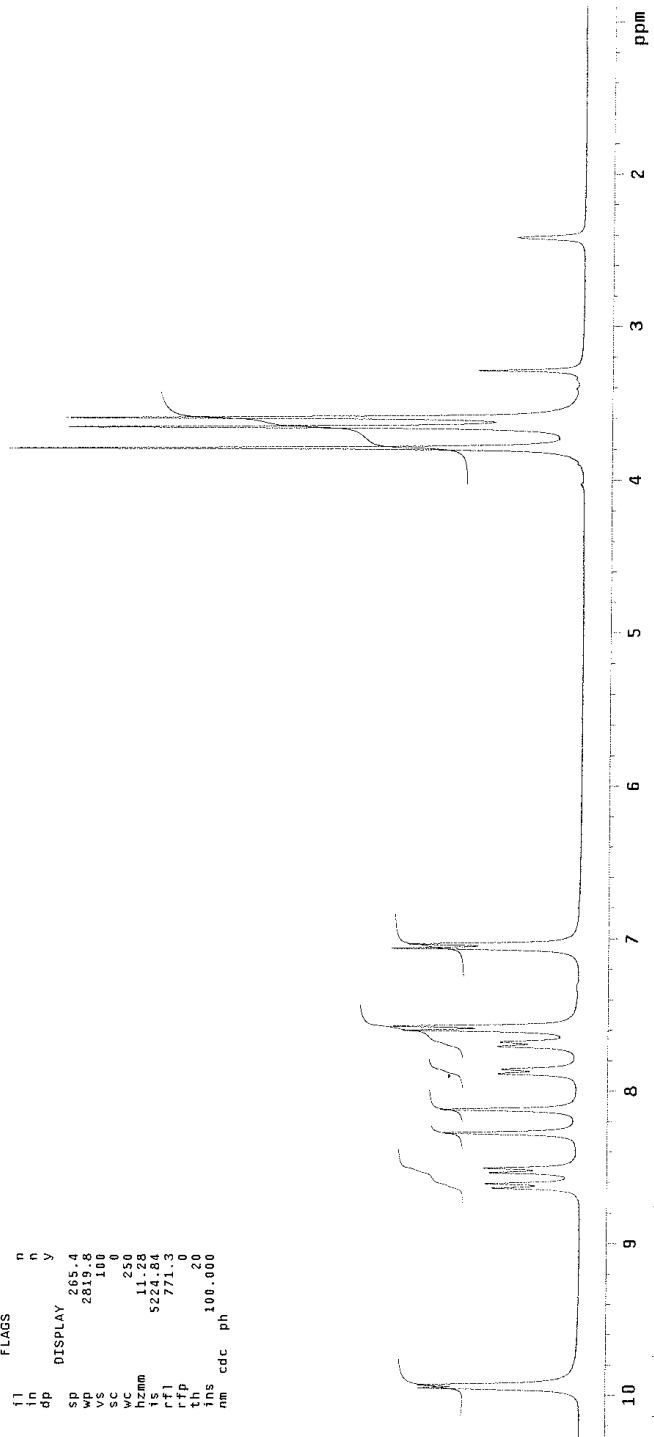

13C OBSERVE

```
expl std13c
SAMPLE
date Apr 11 2011 DEC. & VT
solvent DMSO dfrq 300.050
file exp H1
ACQUISITION exp 39
$frq 75.455 dm 0
n 0.823 dnm 10316
at 32758 dnr PROCESSING 1.15
pp 16761.7 lb
sw 10400 wfile
fb 16 proc ft
bs 16 proc not used
tpwr 53 fn
w 1.327 werr
dw 1024 wbs
tof 0 wexp
nt 1024 wbs
ct 336 wnt
alock not used
gain n
l1 n
l2 n
l3 n
l4 n
l5 n
l6 n
l7 n
l8 n
l9 n
l10 n
l11 n
l12 n
l13 n
l14 n
l15 n
l16 n
l17 n
l18 n
l19 n
l20 n
l21 n
l22 n
l23 n
l24 n
l25 n
l26 n
l27 n
l28 n
l29 n
l30 n
l31 n
l32 n
l33 n
l34 n
l35 n
l36 n
l37 n
l38 n
l39 n
l40 n
l41 n
l42 n
l43 n
l44 n
l45 n
l46 n
l47 n
l48 n
l49 n
l50 n
l51 n
l52 n
l53 n
l54 n
l55 n
l56 n
l57 n
l58 n
l59 n
l60 n
l61 n
l62 n
l63 n
l64 n
l65 n
l66 n
l67 n
l68 n
l69 n
l70 n
l71 n
l72 n
l73 n
l74 n
l75 n
l76 n
l77 n
l78 n
l79 n
l80 n
l81 n
l82 n
l83 n
l84 n
l85 n
l86 n
l87 n
l88 n
l89 n
l90 n
l91 n
l92 n
l93 n
l94 n
l95 n
l96 n
l97 n
l98 n
l99 n
l100 n
nm no ph
SP -114.2
WD 15341.0
S 100
WC 250
hzmm 61.36
IS 500.00
rfl 1824.0
tff 3
tms 100.000
```

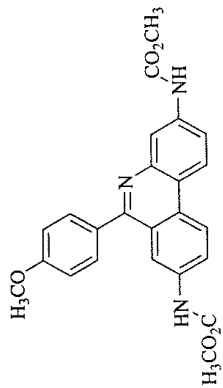

5

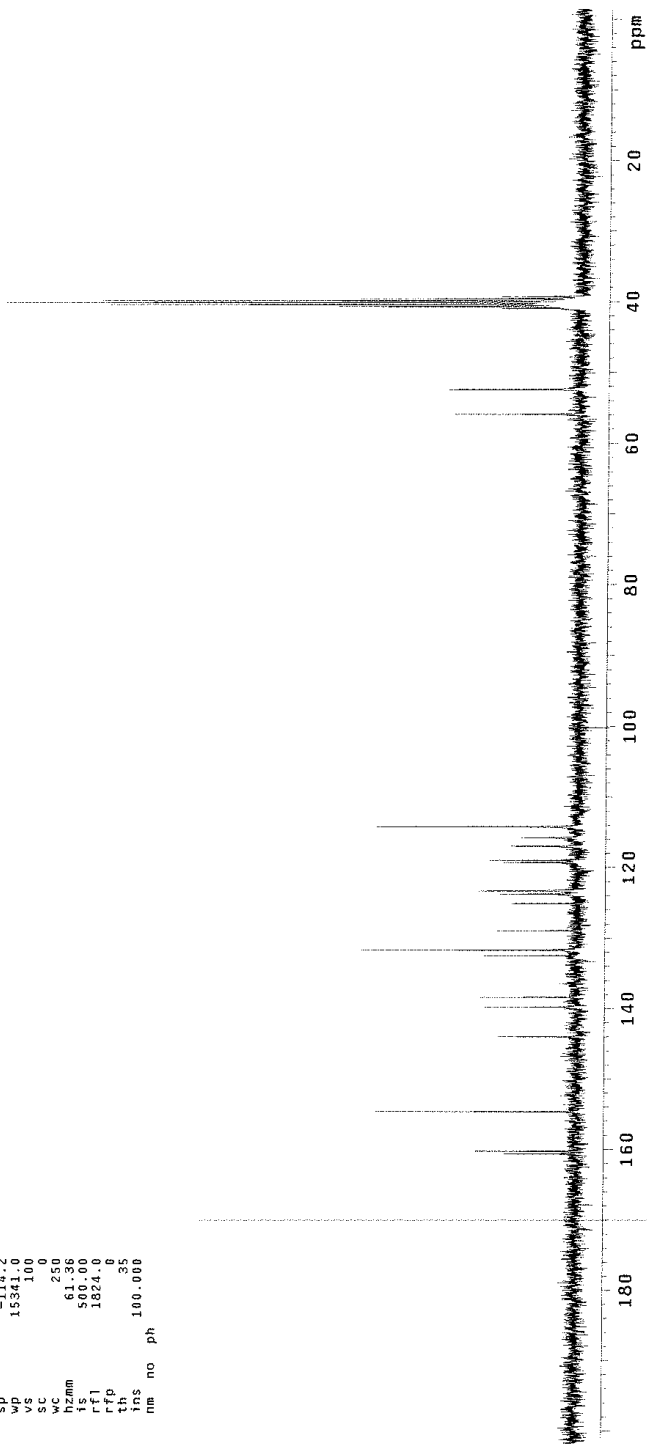

STANDARD 1H OBSERVE

```

exp1 std1h
SAMPLE
date Jun 24 2011 dfrq DEC. & VT 300.050
solvent DMSO dn H1
file exp dpwr 30
ACQUISITION exp dof 0
sfrq 300.050 da nnn C
tn H1 dnm
at 1.000 dmf
sw 17984 wfile
fb 4500.5 proc ft
bs 16 fn not used
tpwr 49
pw 7.0 werr
to 1.000 wexp
nt 64 wnt
ct 32
alock not used
gain n
FLAGS
il R
in R
dp y
DISPLAY -45.5
SP 3064.9
VS 100
SC 250
hzmm 12.26
IS 4454.45
rfi 1496.1
rfp 750.1
tms 20
nm cdc ph 100.000
  
```

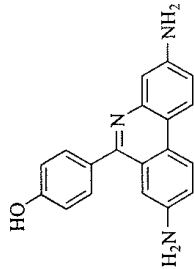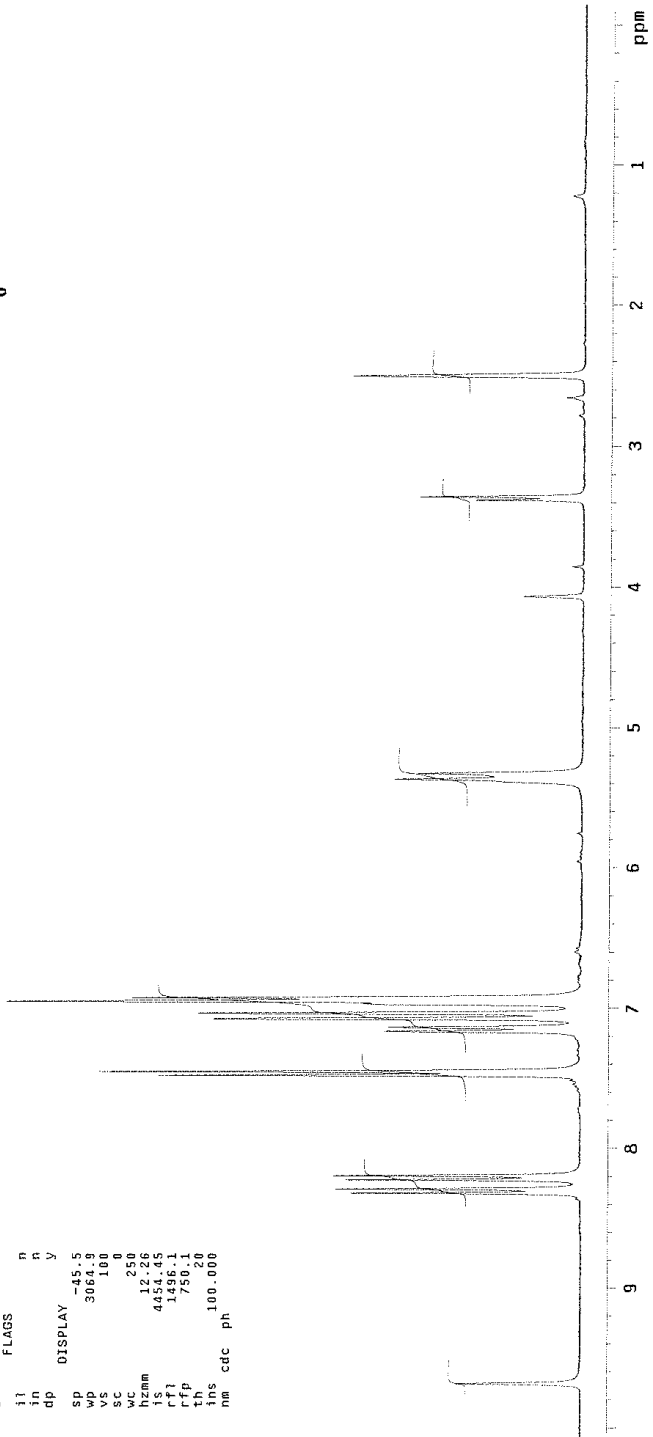

13C OBSERVE

```
expl std13c
date 2011 JUN 24
solvent DMSO
file exp
sfrq 75.485
at 0
sw 32768
fb 187617
bs 16400
tpwr 53
dd 1.327
nt 1024
ci 960
alock not used
gain not used
}l n
}m n
}p y
SP -138.3
WP 15246.0
VS 300
SC 250
hzmm 60.58
IS 500.00
rfi 1824.0
rfp 0
tm 20
nm no ph
```

DEC. & VT

```
300.050
HL
38
0
yyy
10316
dmf
PROCESSING
1.15
wfile
proc
fn
not used
```

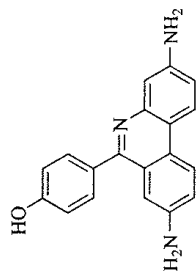

6

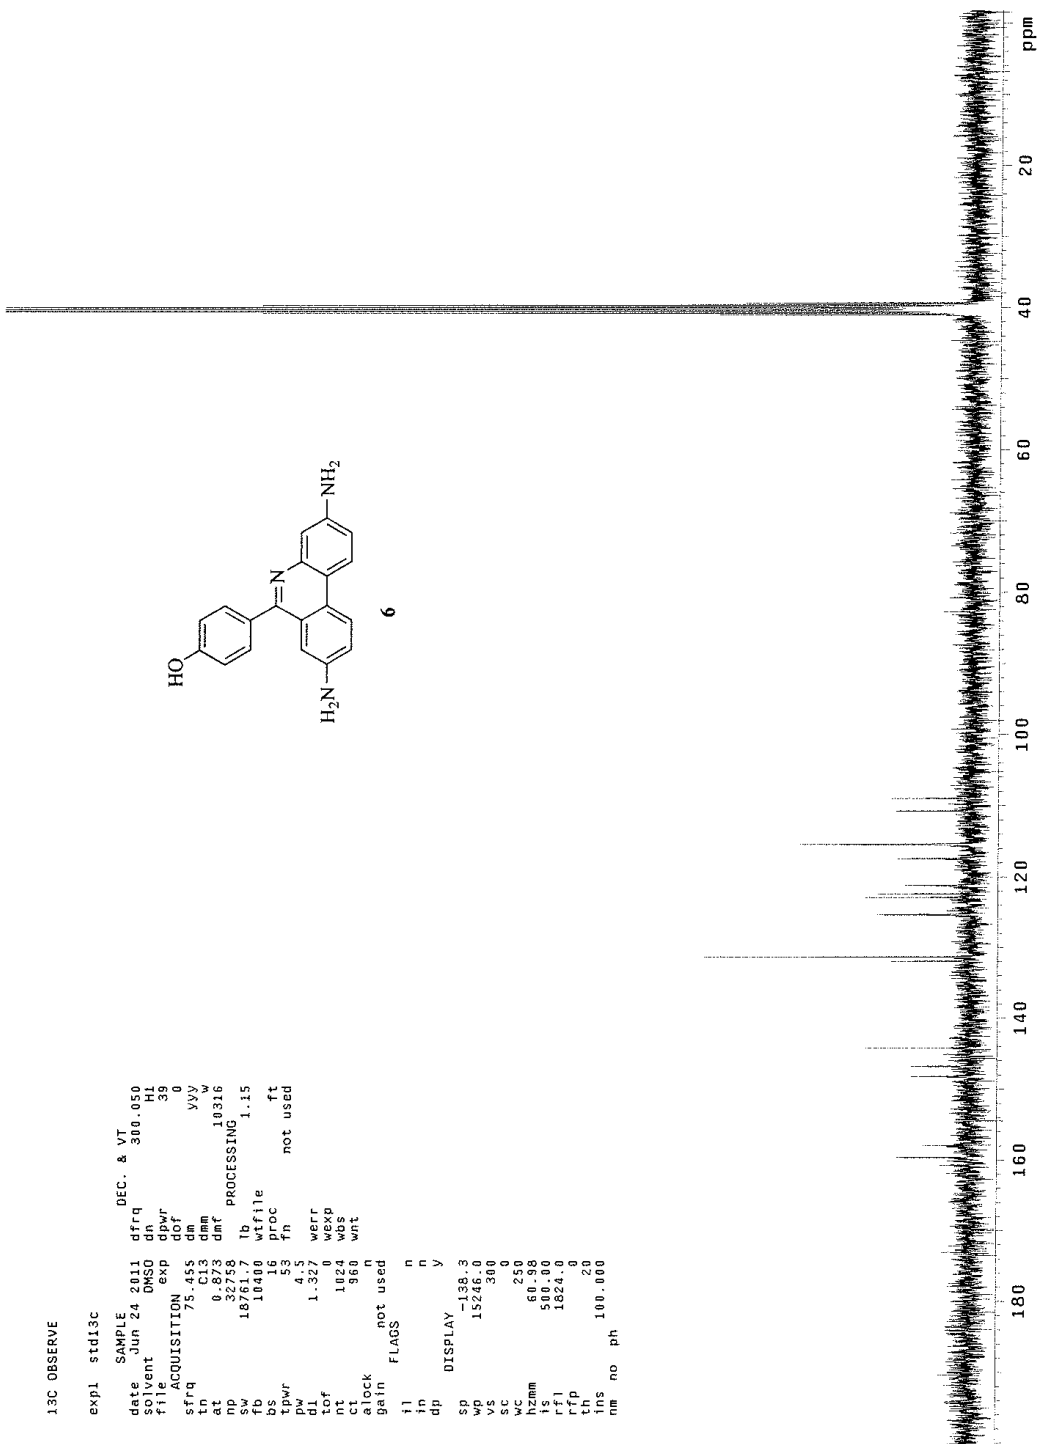

STANDARD 1H OBSERVE

```

exp1 std1h
SAMPLE
date Apr 12 2011 DEC. & VT
solvent DMSO dn 300.050
file exp dpwr H1 30
ACQUISITION exp dof 0
sfrq 300.050 dm nnn C
tn 1.693 dm
nc 1.7934 dmr
sv 4500.5 wtfile
fb 2600 proc ft
bs 16 fn not used
tpwr 49
pw 7.0 werr
to 1.000 wexp
tof 0 wbf
nt 64 wnt
ct 32
alock not used
gain FLAGS
fl n
fn n
dp DISPLAY
SP -42.2
WD 3070.3
XS 300
WC 250
hzmm 12.28
ls 7662.06
rf1 771.3
rfp 0
rns 0
ins 100.000
nm cdc ph
  
```

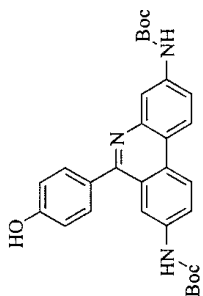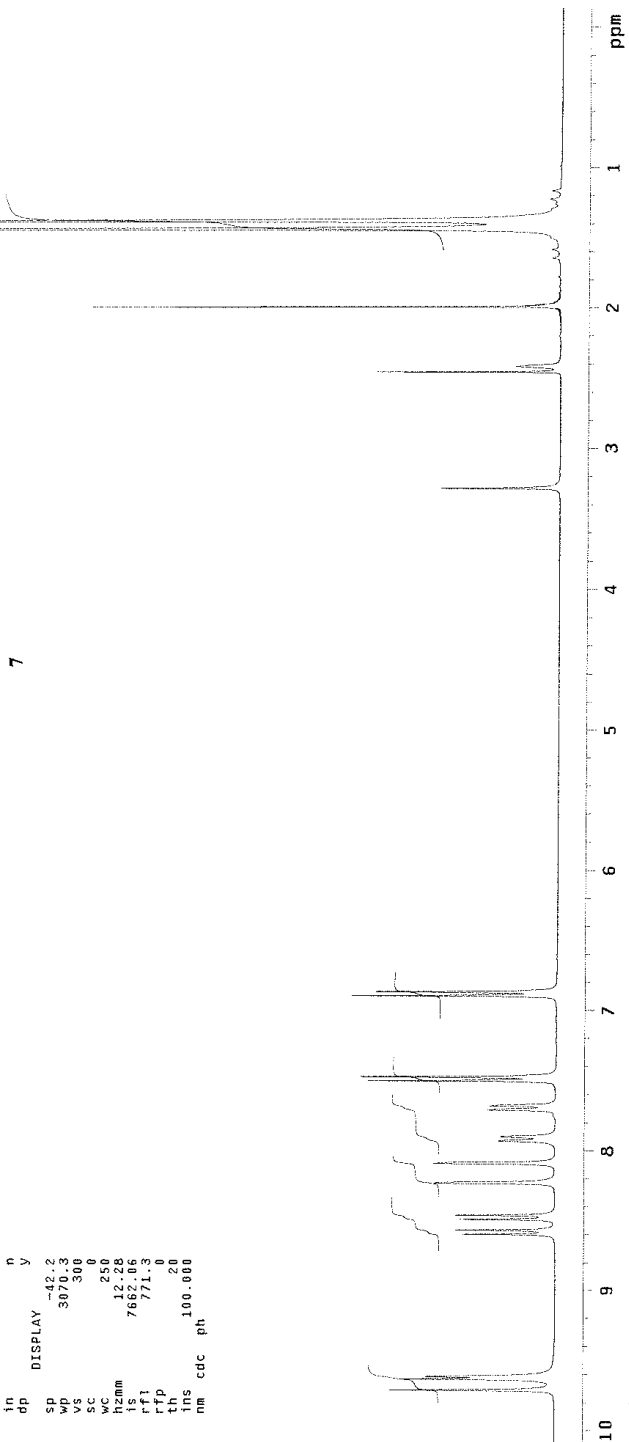

13C OBSERVE

```
expl std13c
SAMPLE
date Apr 12 2011 DEC. & VT
solvent DMSO 300.050
file exp dn
dpwr 39
dof 0
sfrq 75.455 dm yyy
n 0.833 dmm
si 3275.6 dnr 10316
pp 18761.7 lb PROCESSING 1.15
sw 10400 wtf1e
fb 16 proc ft
bs 453 fn not used
tpwr 1.327 werr
pw 1024 wexp
tof 320 wnt
nt 320 wnt
ct 320 wnt
alock n
gain not used
il n
in n
dp n
sp -138.3 DISPLAY
wp 15270.0
vs 150
vc 0
wv 250
hzmm 61.08
is 500.00
rfj 1824.0
rfp 0
tts 0
tpe 0
tpe 100.000
nm no ph
```

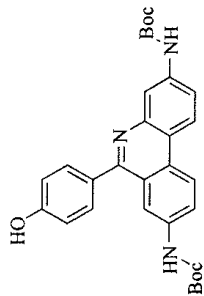

7

180 160 140 120 100 80 60 40 20 ppm



STANDARD 1H OBSERVE

```

expl stdih
SAMPLE
date Jul 31 2009 dfrq DEC. & VT 300.049
solvent Jul 31 2009 dn HI
file C0C13 exp spwr 30
ACQUISITION exp dof 0
sfrq 300.049 dm mnn c
in 1.018 dnm
pd 17984 dnt PROCESSING 200
sw 4500.5 wfile
fb 2600 proc ft
bs 16 fn not used
tpwr 49
pw 7.00 werr
pv 1.000 wexp
tof 0 wcp
nt 16 wat
ct 16
alock n
gain not used
flags n
il n
in n
dp n
DISPLAY
sp -43.4
wp 2780.1
vs 200
wc 250
h2mm 10.80
is 6488.36
rfl 749.7
rfp 0
rps 50
ims 100.000
nm cdc ph
  
```

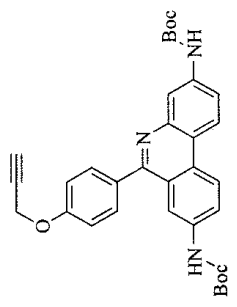

8

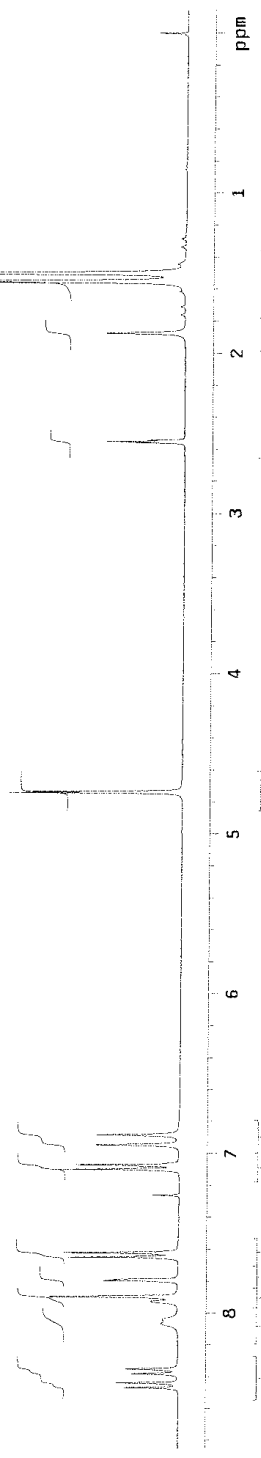

13C OBSERVE

```
expl std13c
SAMPLE
date Jul 31 2009 DEC. & VT
solvent CDC13 dn 300.049
file exp dpwr 39
ACQUISITION exp dof 0
sfrq 75.455 dm yyy
t 0.013 dam
mp 32758 dnr 10316
sw 18761.7 lb PROCESSING 1.15
fb 10400 wf file
bs 16 proc ft
tpwr 53 fn not used
pv 4.5 werr
tq 1.320 wexp
nt 1024 wbp
ct 608 wnt
alock n
gain not used
il n
in n
dp n
DISPLAY
sp -224.0
wp 15484.2
s 50
s2 50
wc 250
h2mm 61.94
is 500.00
rf1 7648.2
rfp 5809.4
lfs 4
nm no ph 100.000
```

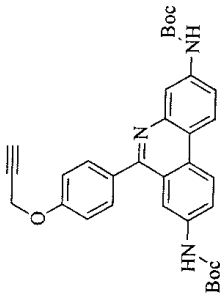

8

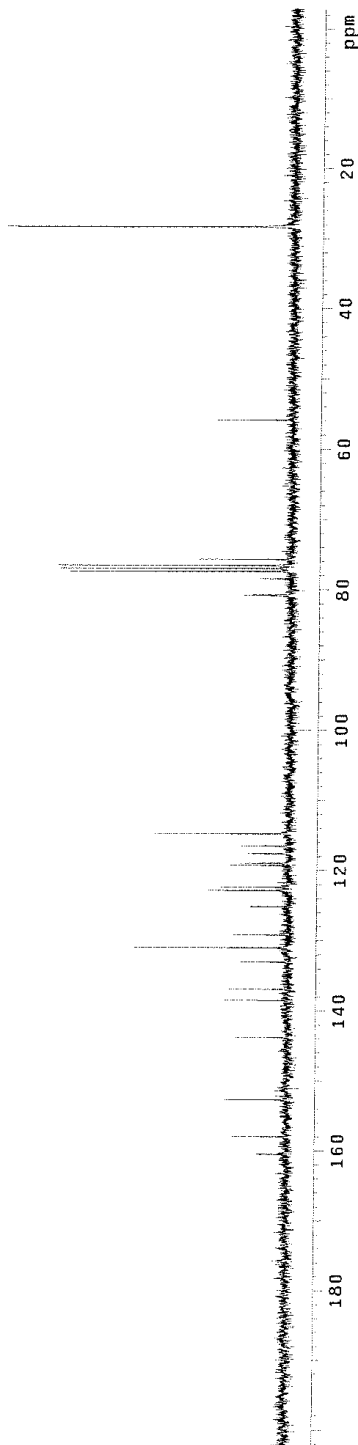

STANDARD 1H OBSERVE

```

exp1 std1h
SAMPLE
date Jul 12 2011 DEC. & VT
solvent DMSO H1
file exp 30
ACQUISITION exp 30
sfrq 300.050 dm nnp
at 1.98 dnm c
ap 1.7984 dnr PROCESSING 200
sw 4500.5 wfile
fb 2600 proc ft
bs 16 fn not used
tpwr 79
pw 7.00 werr
tof 1.000 wexp
nt 64 wnt
ct 32
alock n
gain not used
fl n
in n
dp n
DISPLAY
SP -40.1
WD 3178.6
SC 29.0
WC 250
hzmm 12.71
is 6410.68
rfi 1486.5
rfp 750.1
ins 100.00
nm cdc ph
  
```

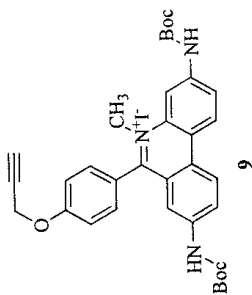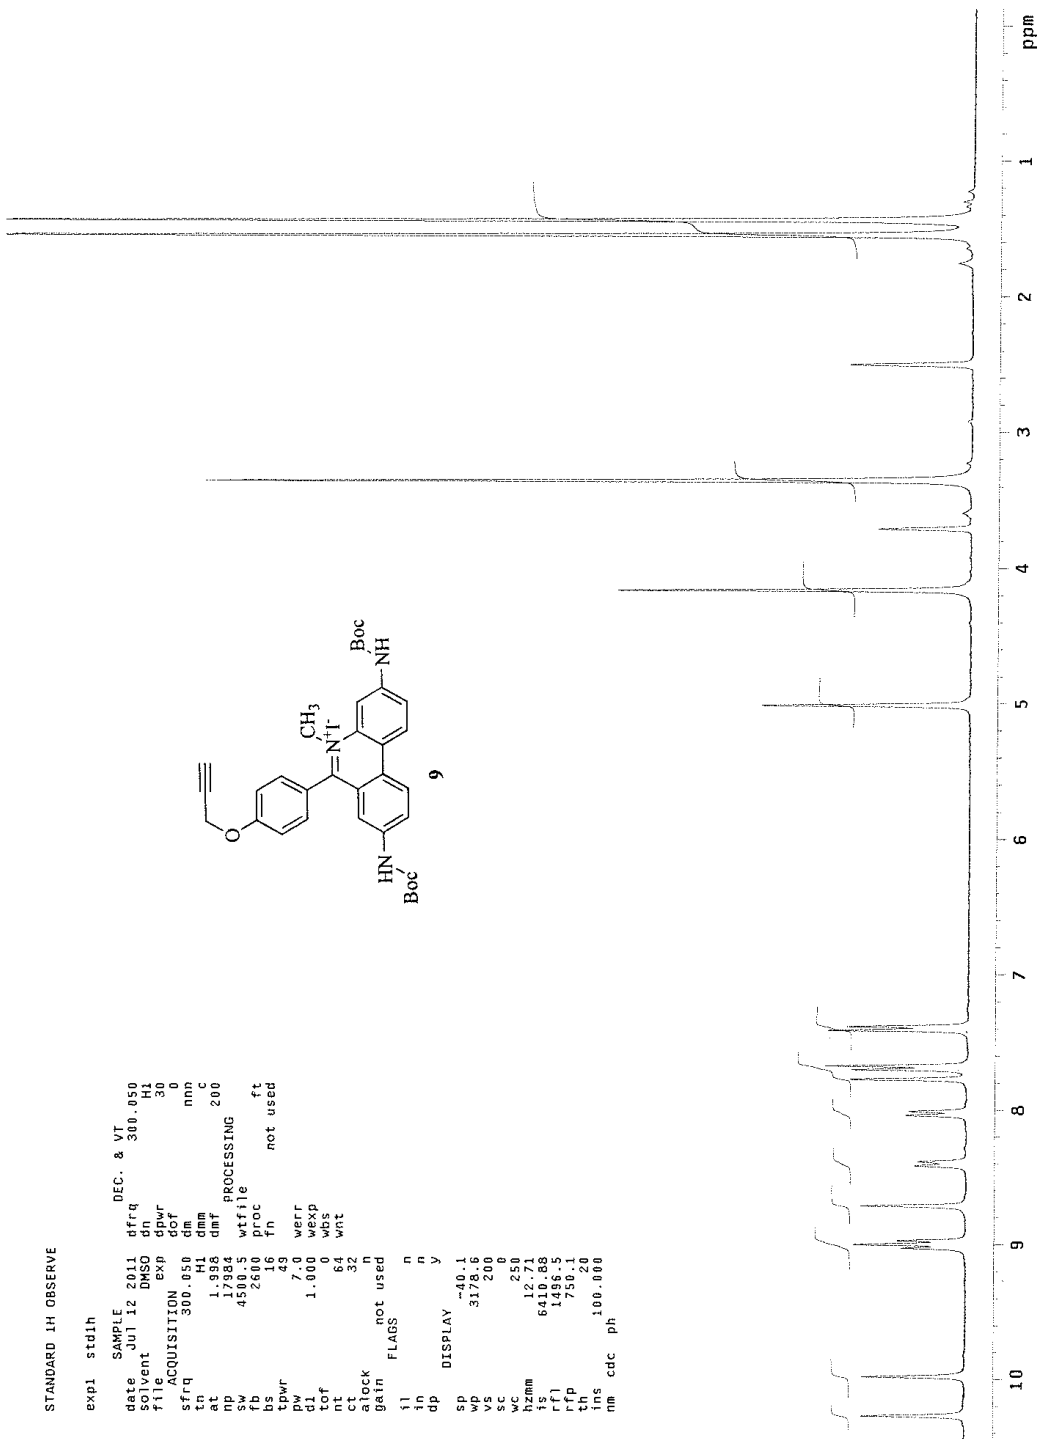

13C OBSERVE

```
exp1 st013c
SAMPLE
date Jul 19 2011 DEC. & VT
solvent DMSO dfrq 300.050
file H1 dn 39
dpwr exp 39
sfrq ACQUISITION 75.455 dm 0
at 0.873 dmf 10318
np 32758 dmf PROCESSING 1.15
fb 18761.7 lb wfile
bs 18400 wfproc ft
tpwr 18 fn not used
dt 42 werr
dl 1.327 wexp
tof 0 wbs
nt 5000 wnt
ct 2524 wnt
alock n
gain not used
il n
in n
dp n
DISPLAY y
SP -138.3
WP 15318.1
SC 500
WC 250
hzmm 61.27
IS 500.00
RFI 1824.0
TH 20
tms 100.000
nm no ph
```

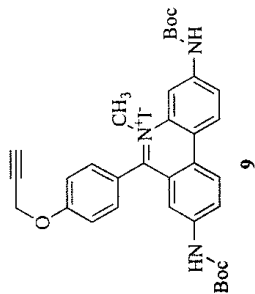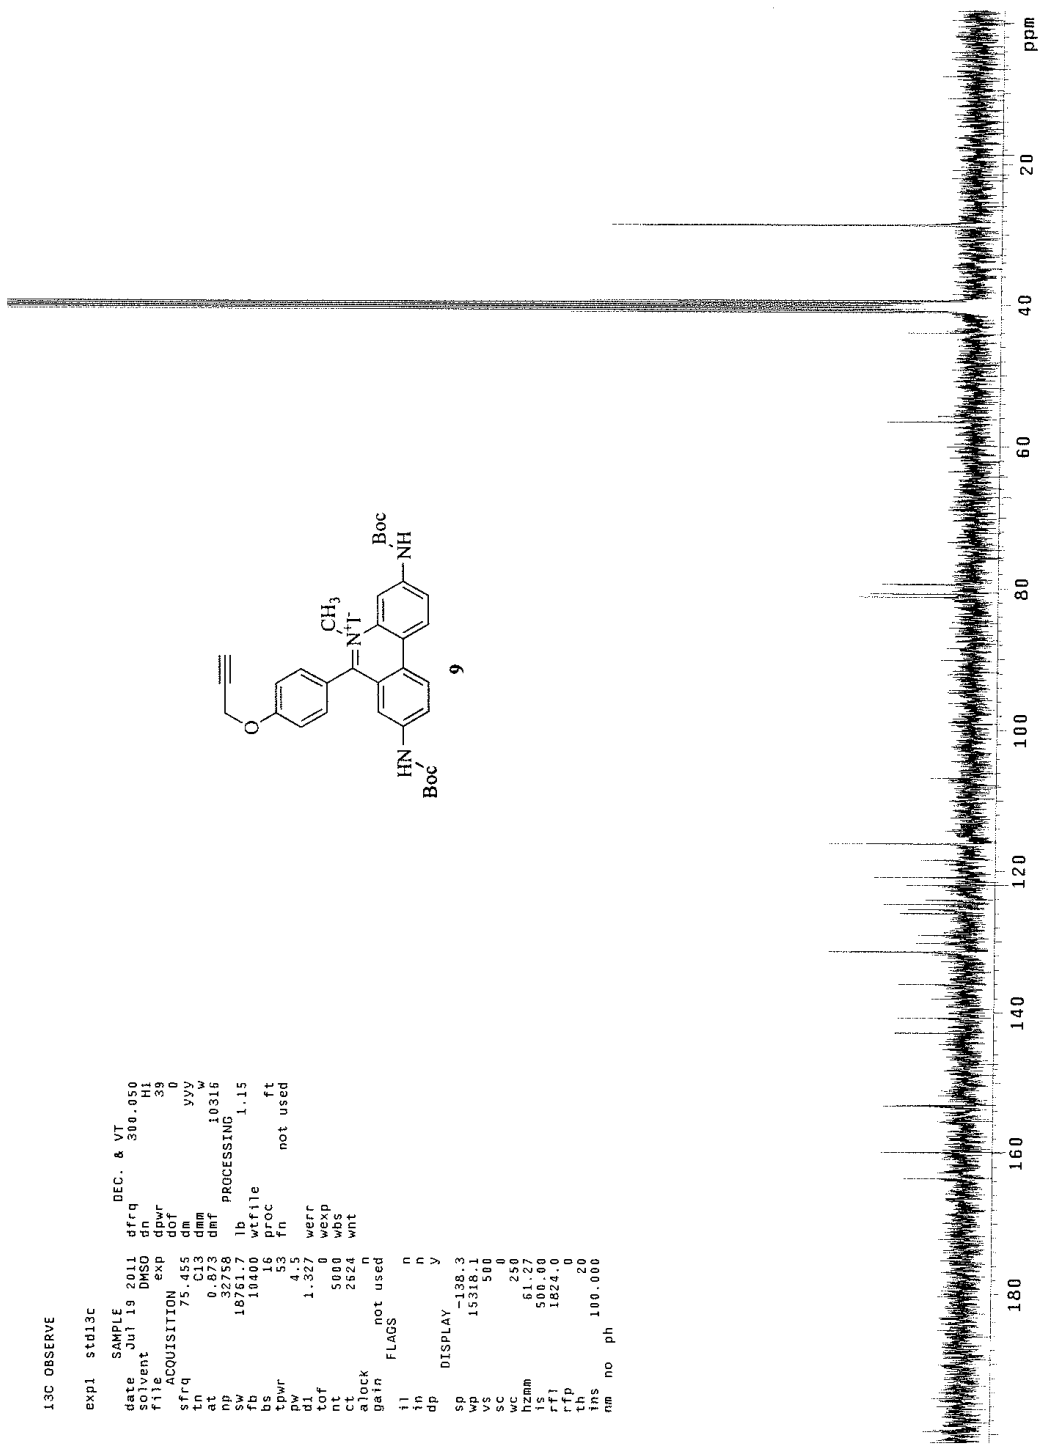

STANDARD 1H OBSERVE

```

exp1 std1h
SAMPLE
date Jun 4 2009 DEC. & VT
solvent CDC13 dfrq 300.049
file CDC13 dn 30
ACQUISITION exp dpr 0
sfrq 300.049 dm nnn c
tn 1.000 dmm
np 1788 dnr PROCESSING 200
sw 4500.5 wf file
fb 2600 proc
bs 16 fn not used
tpwr 49
pw 7.0 werr
pc 1.000 wexp
tof 18 wat
ct 16
alock n
gain not used
flags n
il n
in n
dp n y
DISPLAY
sp -41.0
wp 2392.4
vs 200
vc 0
wc 250
hzmm 9.57
is 7416.33
rfj 753.0
rfp 0
ins 0
nm cdc ph 100.000
  
```

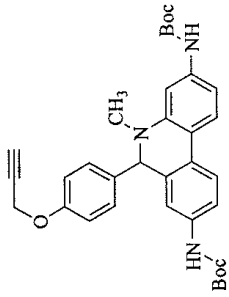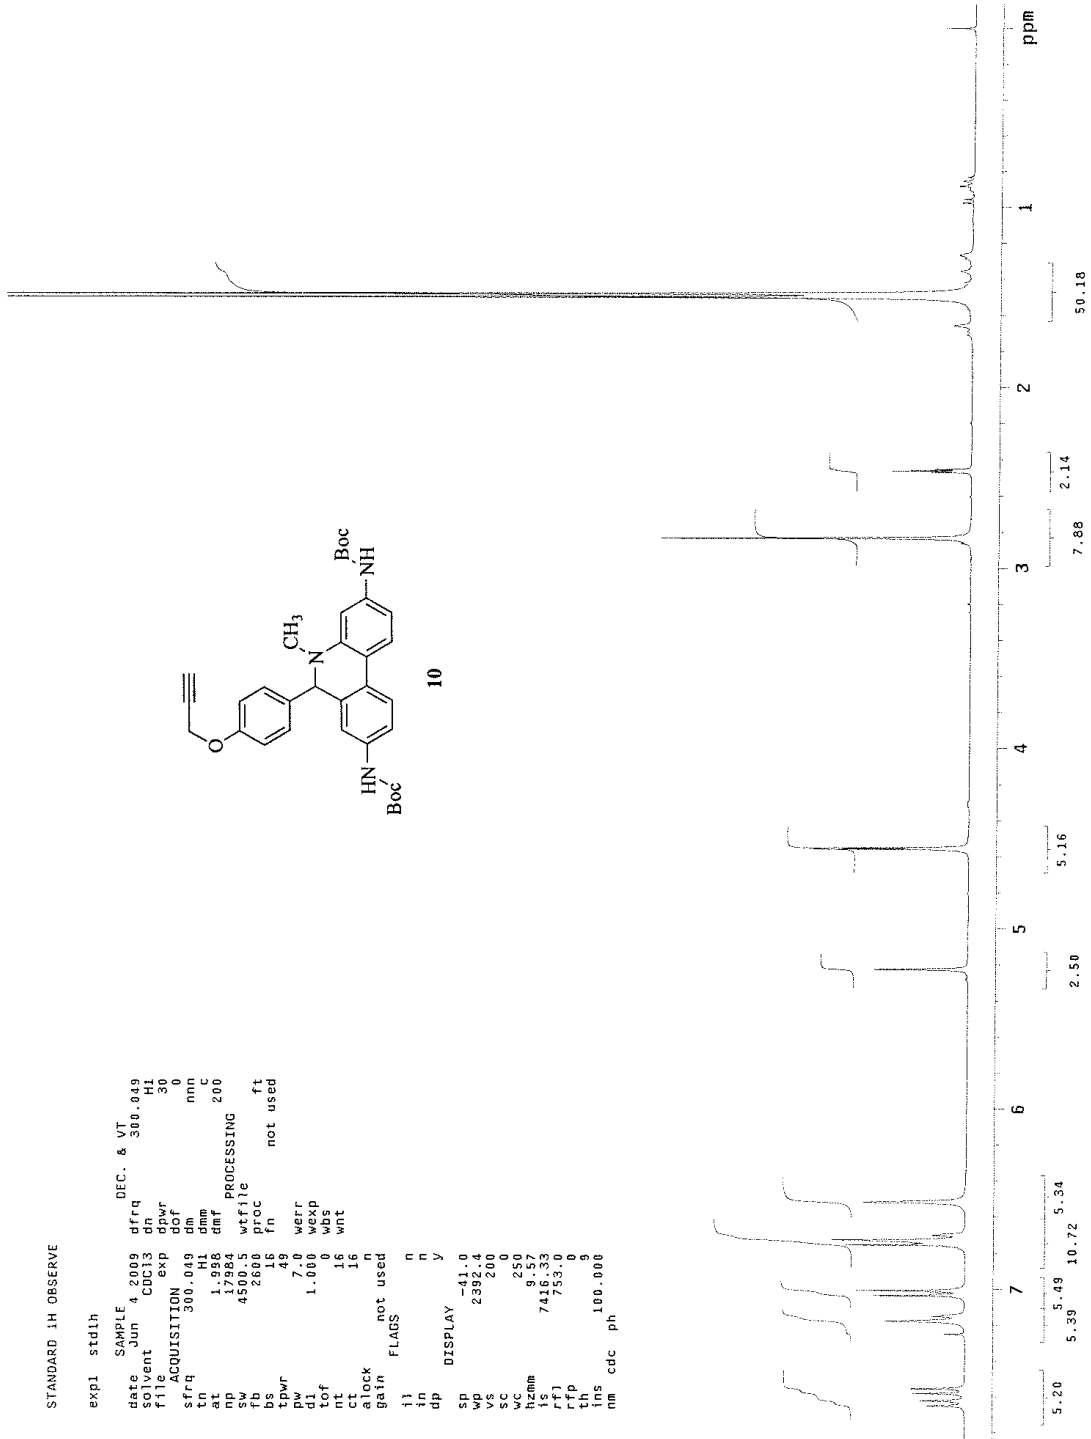

13C OBSERVE

```
exp1 std13c
SAMPLE
date Jun 4 2009 dfrq DEC. & VT 300.049
solvent CDCl3 dn HI 39
file exp dpwr 39
ACQUISITION exp dof 0
strq 75.455 dm yvy
in 0 C13 dmm 10316
nd 32768 dmr PROCESSING 1.15
sw 18761.7 lb wifile
fb 10400 wifile
bs 16 proc ft
tpwr 43 fn not used
dv 1.327 werr
dt 0 wexp
tof 1024 wbs
ct 320 wnt
alock
gain not used
flags
il n
in n
ip n
dp DISPLAY Y
sp -153.8
wd 15436.1
sc 100
wc 250
hzmm 61.74
is 500.00
rfi 7648.9
rfp 5809.4
ns
lps
na no ph 100.000
```

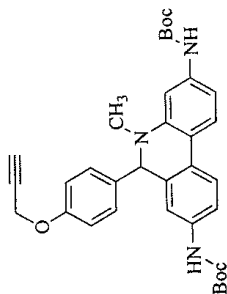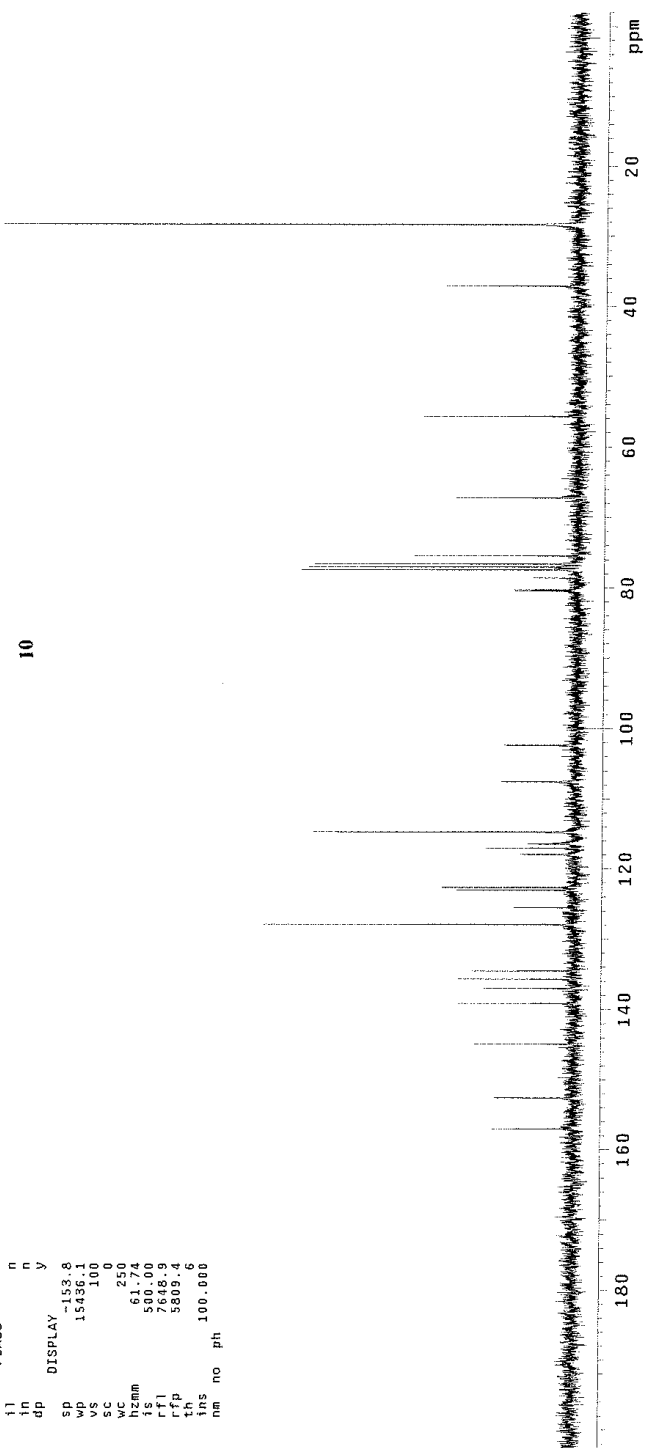

STANDARD 1H OBSERVE

```

exp1 stdih
SAMPLE      DEC. & VT
date        5 2009   dfrq 300.019
solvent     CDCl3   dn    30
file        exp     dpr   0
ACQUISITION
sfrq       300.049  dm    nnn  c
in         1.81     dm    nnn  c
at         1.886    dar  PROCESSING 200
sw         45000    wifile
fb         2600    proc
bs         16      fh    not used
tpwr       49
pw         7.0     werr
dd         1.000   wexp
ds         0       wps
nt         16     wnt
ct         16
alock      n
gain       not used
FLAGS
il         n
in         n
dp         y
DISPLAY
sp         -58.4
wp         2500.6
vs         200
vc         0
wc         250
hzmm       10.00
is         8090.22
rf1        747.6
rfp         0
th         20
ms         100.000
nm cdc ph
  
```

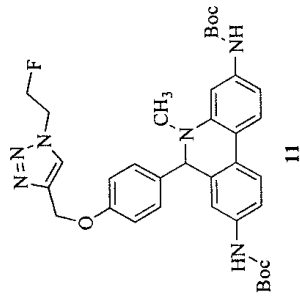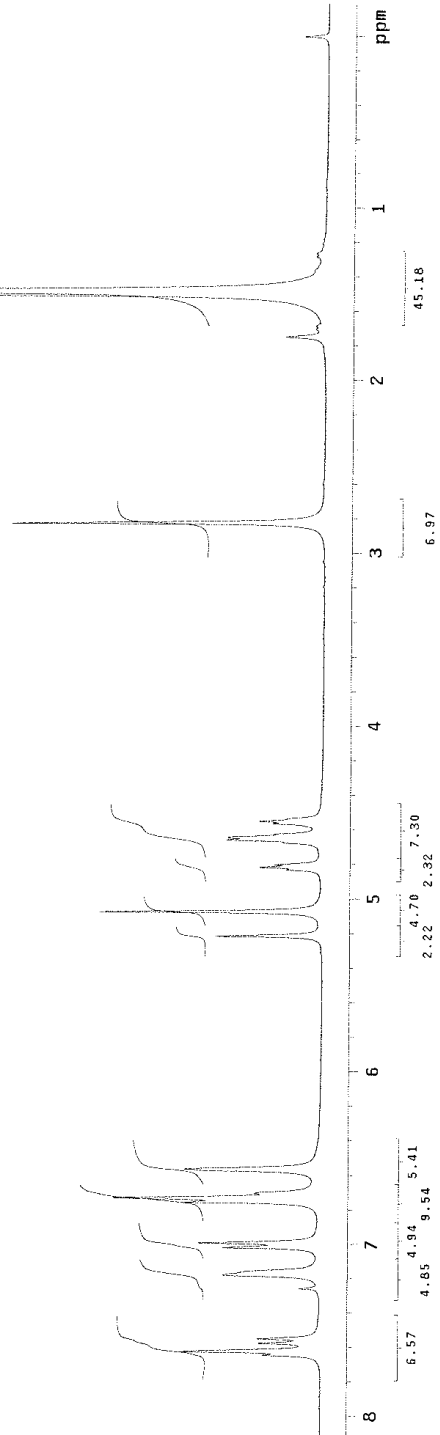

13C OBSERVE

```
exp1 std13c
date SAMPLE DEC. & VT
Jun 5 2009 dfrq 300.048
Solvent C6Cl3 dfr 39
file C6Cl3 exp 39
ACQUISITION def 0
sfrq 75.455 dm yyy w
t1 0.013 dm
at 3.327 dm 1.0316
SW 18761.7 lb dmf PROCESSING 1.15
fb 10400 wfile
bs 18 proc ft
tpwr 53 fn not used
pw 4.5
d1 1.327 werr
nt 102 wexp
ct 448 wnt
alock n
gain not used
flags n
f1 n
f2 n
f3 y
DISPLAY
sp -133.8
wp 15318.1
vs 100
sc 0
sv 250
h2mm 61.27
is 500.00
rf1 7648.9
rfp 5889.4
t1 20
ms 100.000
nm no ph
```

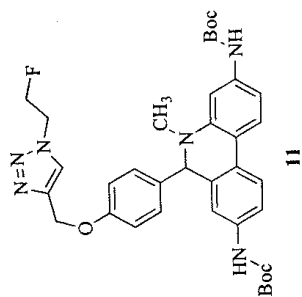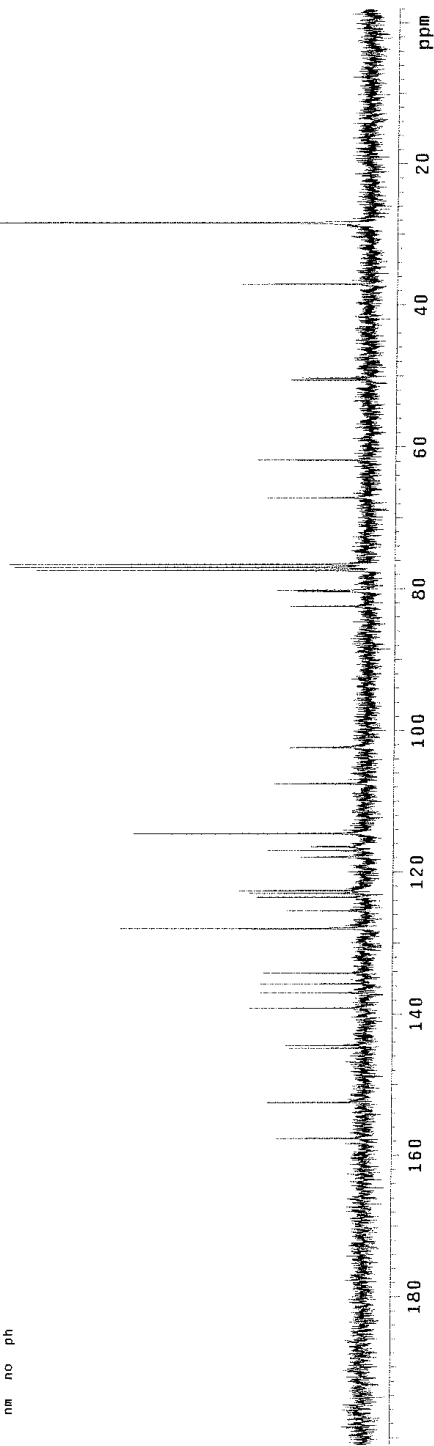



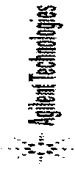

WC08162112-2

Sample Name:  
WC08162112-2  
Data Collected on:  
busch-vmr400  
Archive directory:  
/home/vmr\_bm/vmr400/data  
Sample directory:  
WC08162112-2\_20120816\_01  
Fidfile: PROTON\_01

Pulse Sequence: PROTON (s2pul)  
Solvent: dmsc  
Data collected on: Aug 16 2012

Temp. 25.0 C / 298.1 K  
Sample #46, Operator: wenhau  
Relax. delay 1.000 sec  
Pulse 45.0 degrees  
Acq. time 2.556 sec  
Width 6410.3 Hz  
8 repetitions  
OBSERVE H1, 399.7473296 MHz  
DATA PROCESSING  
F1 size 32768  
Total time 0 min 28 sec

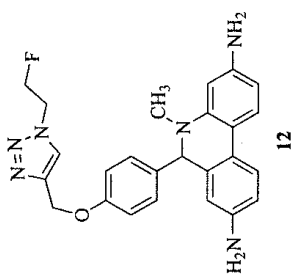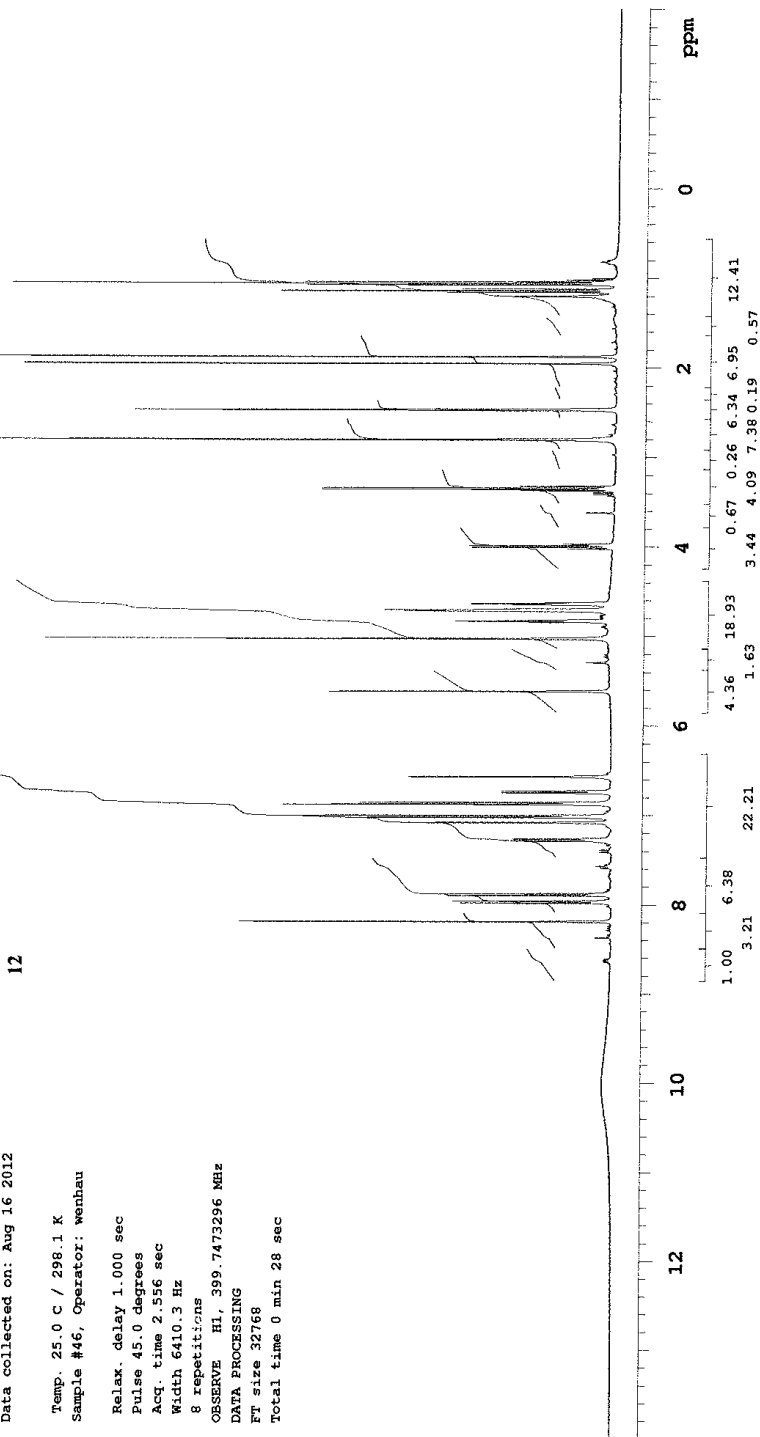

WC08162112-2

Sample Name:  
 WC08162112-2  
 Data Collected on:  
 busch-vmr400  
 Archive directory:  
 /home/vmr\_fm/vmr400/data  
 Sample directory:  
 WC08162112-2\_20120816\_01  
 Fidfile: CARBON\_01

Pulse Sequence: CARBON (s2pul)  
 Solvent: dmsc  
 Data collected on: Aug 16 2012

Temp. 25.0 C / 298.1 K  
 Sample #46, Operator: wenhau

Relax. delay 1.000 sec  
 Pulse 45.0 degrees  
 Acq. time 1.285 sec  
 Width 25510.2 Hz  
 256 repetitions  
 OBSERVE C13, 100.5165460 MHz  
 DECOUPLE H1, 399.7493284 MHz  
 Power 34 dB  
 continuously on  
 WALTZ-16 modulated  
 DATA PROCESSING  
 Line broadening 0.5 Hz  
 F1 size 65536  
 Total time 9 min 45 sec

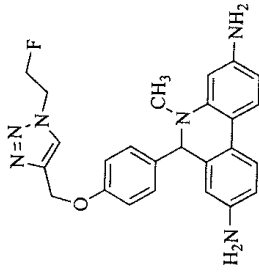

12

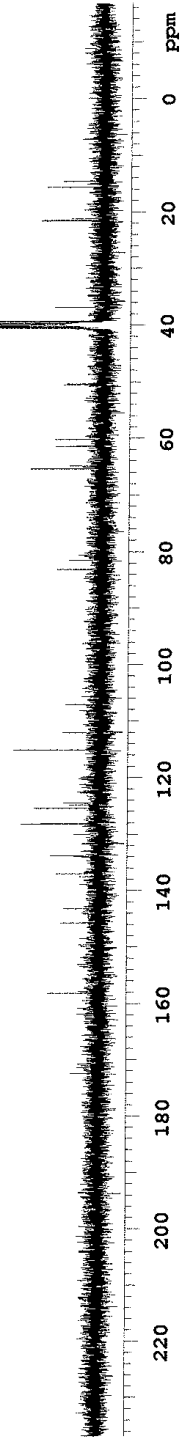

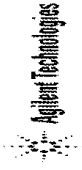

wc08172112

Sample Name:  
wc08172112  
Data Collected on:  
busch-vmr400  
Archive directory:  
/home/vmr\_fm/vmr400/data  
Sample directory:  
wc08172112\_20120817\_01  
Fidfile: PROTON\_01

Pulse Sequence: PROTON (s2pul)  
Solvent: dmsc  
Data collected on: Aug 17 2012

Temp. 25.0 C / 298.1 K  
Sample #46, Operator: wenhau

Relax. delay 1.000 sec  
Pulse 45.0 degrees  
Acq. time 2.556 sec  
Width 6410.3 Hz  
8 repetitions  
OBSERVE H1, 399.7473296 MHz  
DATA PROCESSING  
F1 size 32768  
Total time 0 min 28 sec

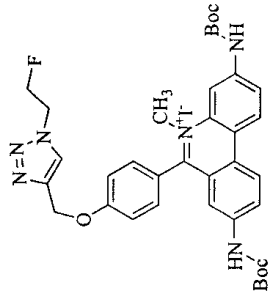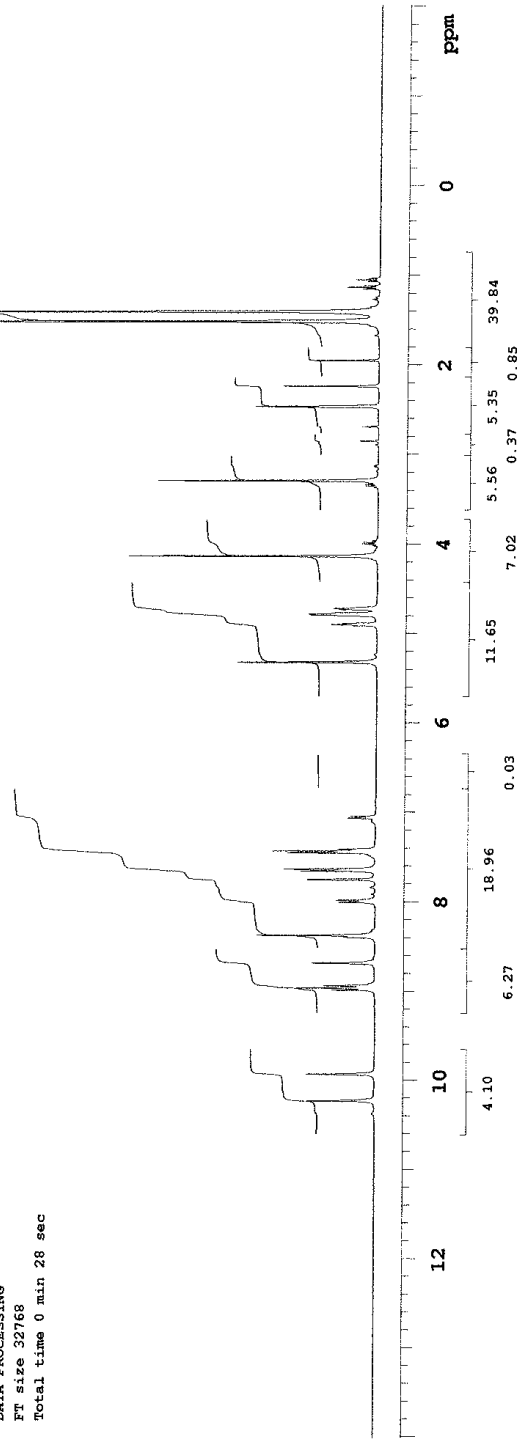

wc08172112

Sample Name:  
wc08172112  
Data Collected on:  
busch-vmr5400  
Archive directory:  
/home/vmr\_fm/vmr5400/data  
Sample directory:  
wc08172112\_20120817\_01  
FidFile: CARBON\_01

Pulse Sequence: CARBON (s2pul)  
Solvent: dmsc  
Data collected on: Aug 17 2012

Temp. 25.0 C / 298.1 K  
Sample #46, Operator: wenhau

Relax. delay 1.000 sec  
Pulse 45.0 degrees  
Acq. time 1.285 sec  
Width 25510.2 Hz  
256 repetitions  
OBSERVE C13, 100.5165460 MHz  
DECOUPLE H1, 399.7493284 MHz  
Power 34 dB  
continuously on  
WALTZ-16 modulated  
DATA PROCESSING  
Line broadening 0.5 Hz  
Ft size 65536  
Total time 9 min 45 sec

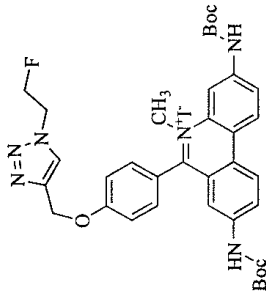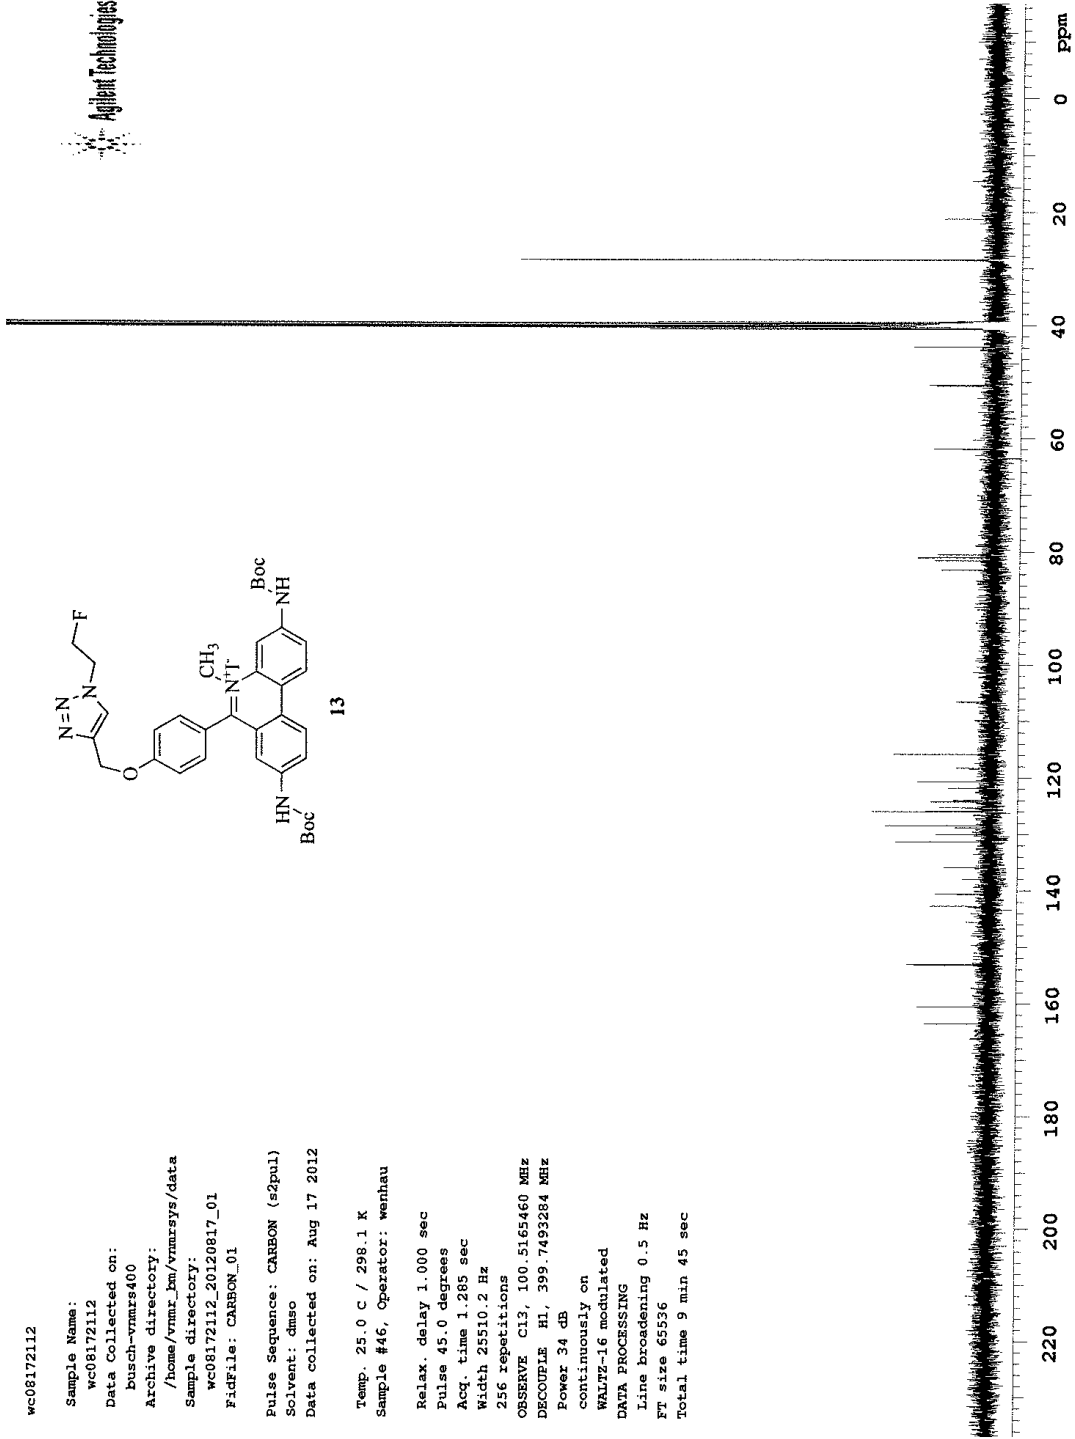



wc08222112

expl14 CARBON

```
SAMPLE PRESATURATION
date Aug 22 2012 satmode n
solvent dmsc wet n
file /home/vnmr_fm- SPECIAL
/vnmrsys/Automatic- temp 25.0
n/auto_20120822_01- gain 30
/enterQ.macdir/loc- spin not used
46_001/current bst 0.008
ACQUISITION pw90 6.500
sw 25510.2 alfa 10.000
at 1.285 FLAGS
np 65536 il n
fb 17000 in n
bs 64 qb y
dl 1.000 hs nm
nt 256 PROCESSING
ct 64 lb 0.50
tn TRANSMITTER C13 DISPLAY
sftq 100.528 SP -91.4
tof 1530.6 wp 20402.4
tpwr 59 pfl 1698.3
pw 3.250 rfp 0
DECOUPLER rp -90.7
dn H1 lp 0
dof 0 PLOT
dm YYY WC 250
decwave w sc 0
dpwr 34 vs 119821
dmf 10101 th 11
ai cdc ph
```

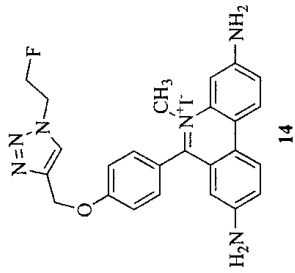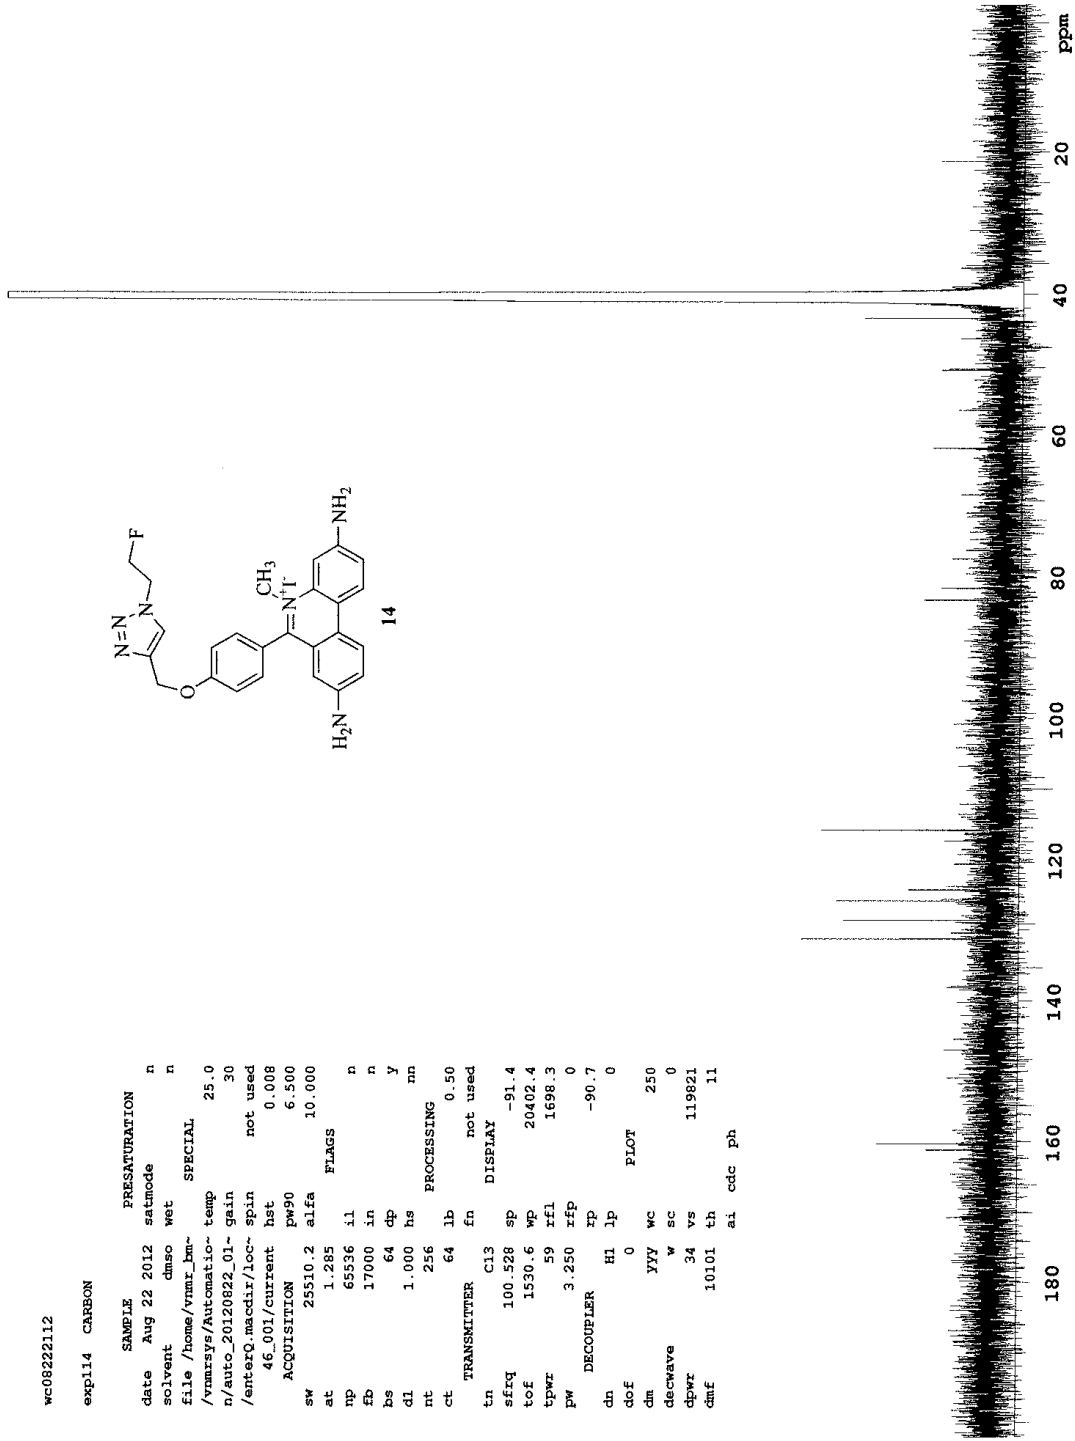

Supplement: NIHMS600161-supplement-ESI.pdf [file NIHMS600161-supplement-ESI.pdf]
